# Supplementary material for: An updated tropospheric chemistry reanalysis and emission estimates, TCR-2, for 2005–2018
Source: Copernicus journal article supplement (doi:10.5194/essd-2020-30), 2020-04-03
Supplement: Supplementary file 1 [file tcr2_figs_supplement.pdf › tcr2_figs_supplement.pdf]

Fig. S1: Latitude–pressure cross section of mean ozone concentration (in ppb) obtained from HIPPO aircraft measurements (first row), control run (second row), and reanalysis (third row). The relative difference (in %) between the control run and the observation (fourth row) and between the reanalysis and the observation (fifth row) is also shown. Results are shown for all HIPPO campaigns (from left to right: HIPPO I, 8–30 January 2009; HIPPO II, 31 October to 22 November 2009; HIPPO III, 24 March to 16 April 2010; HIPPO IV, 14 June to 11 July 2011; and HIPPO V, 9 August to 9 September 2011).

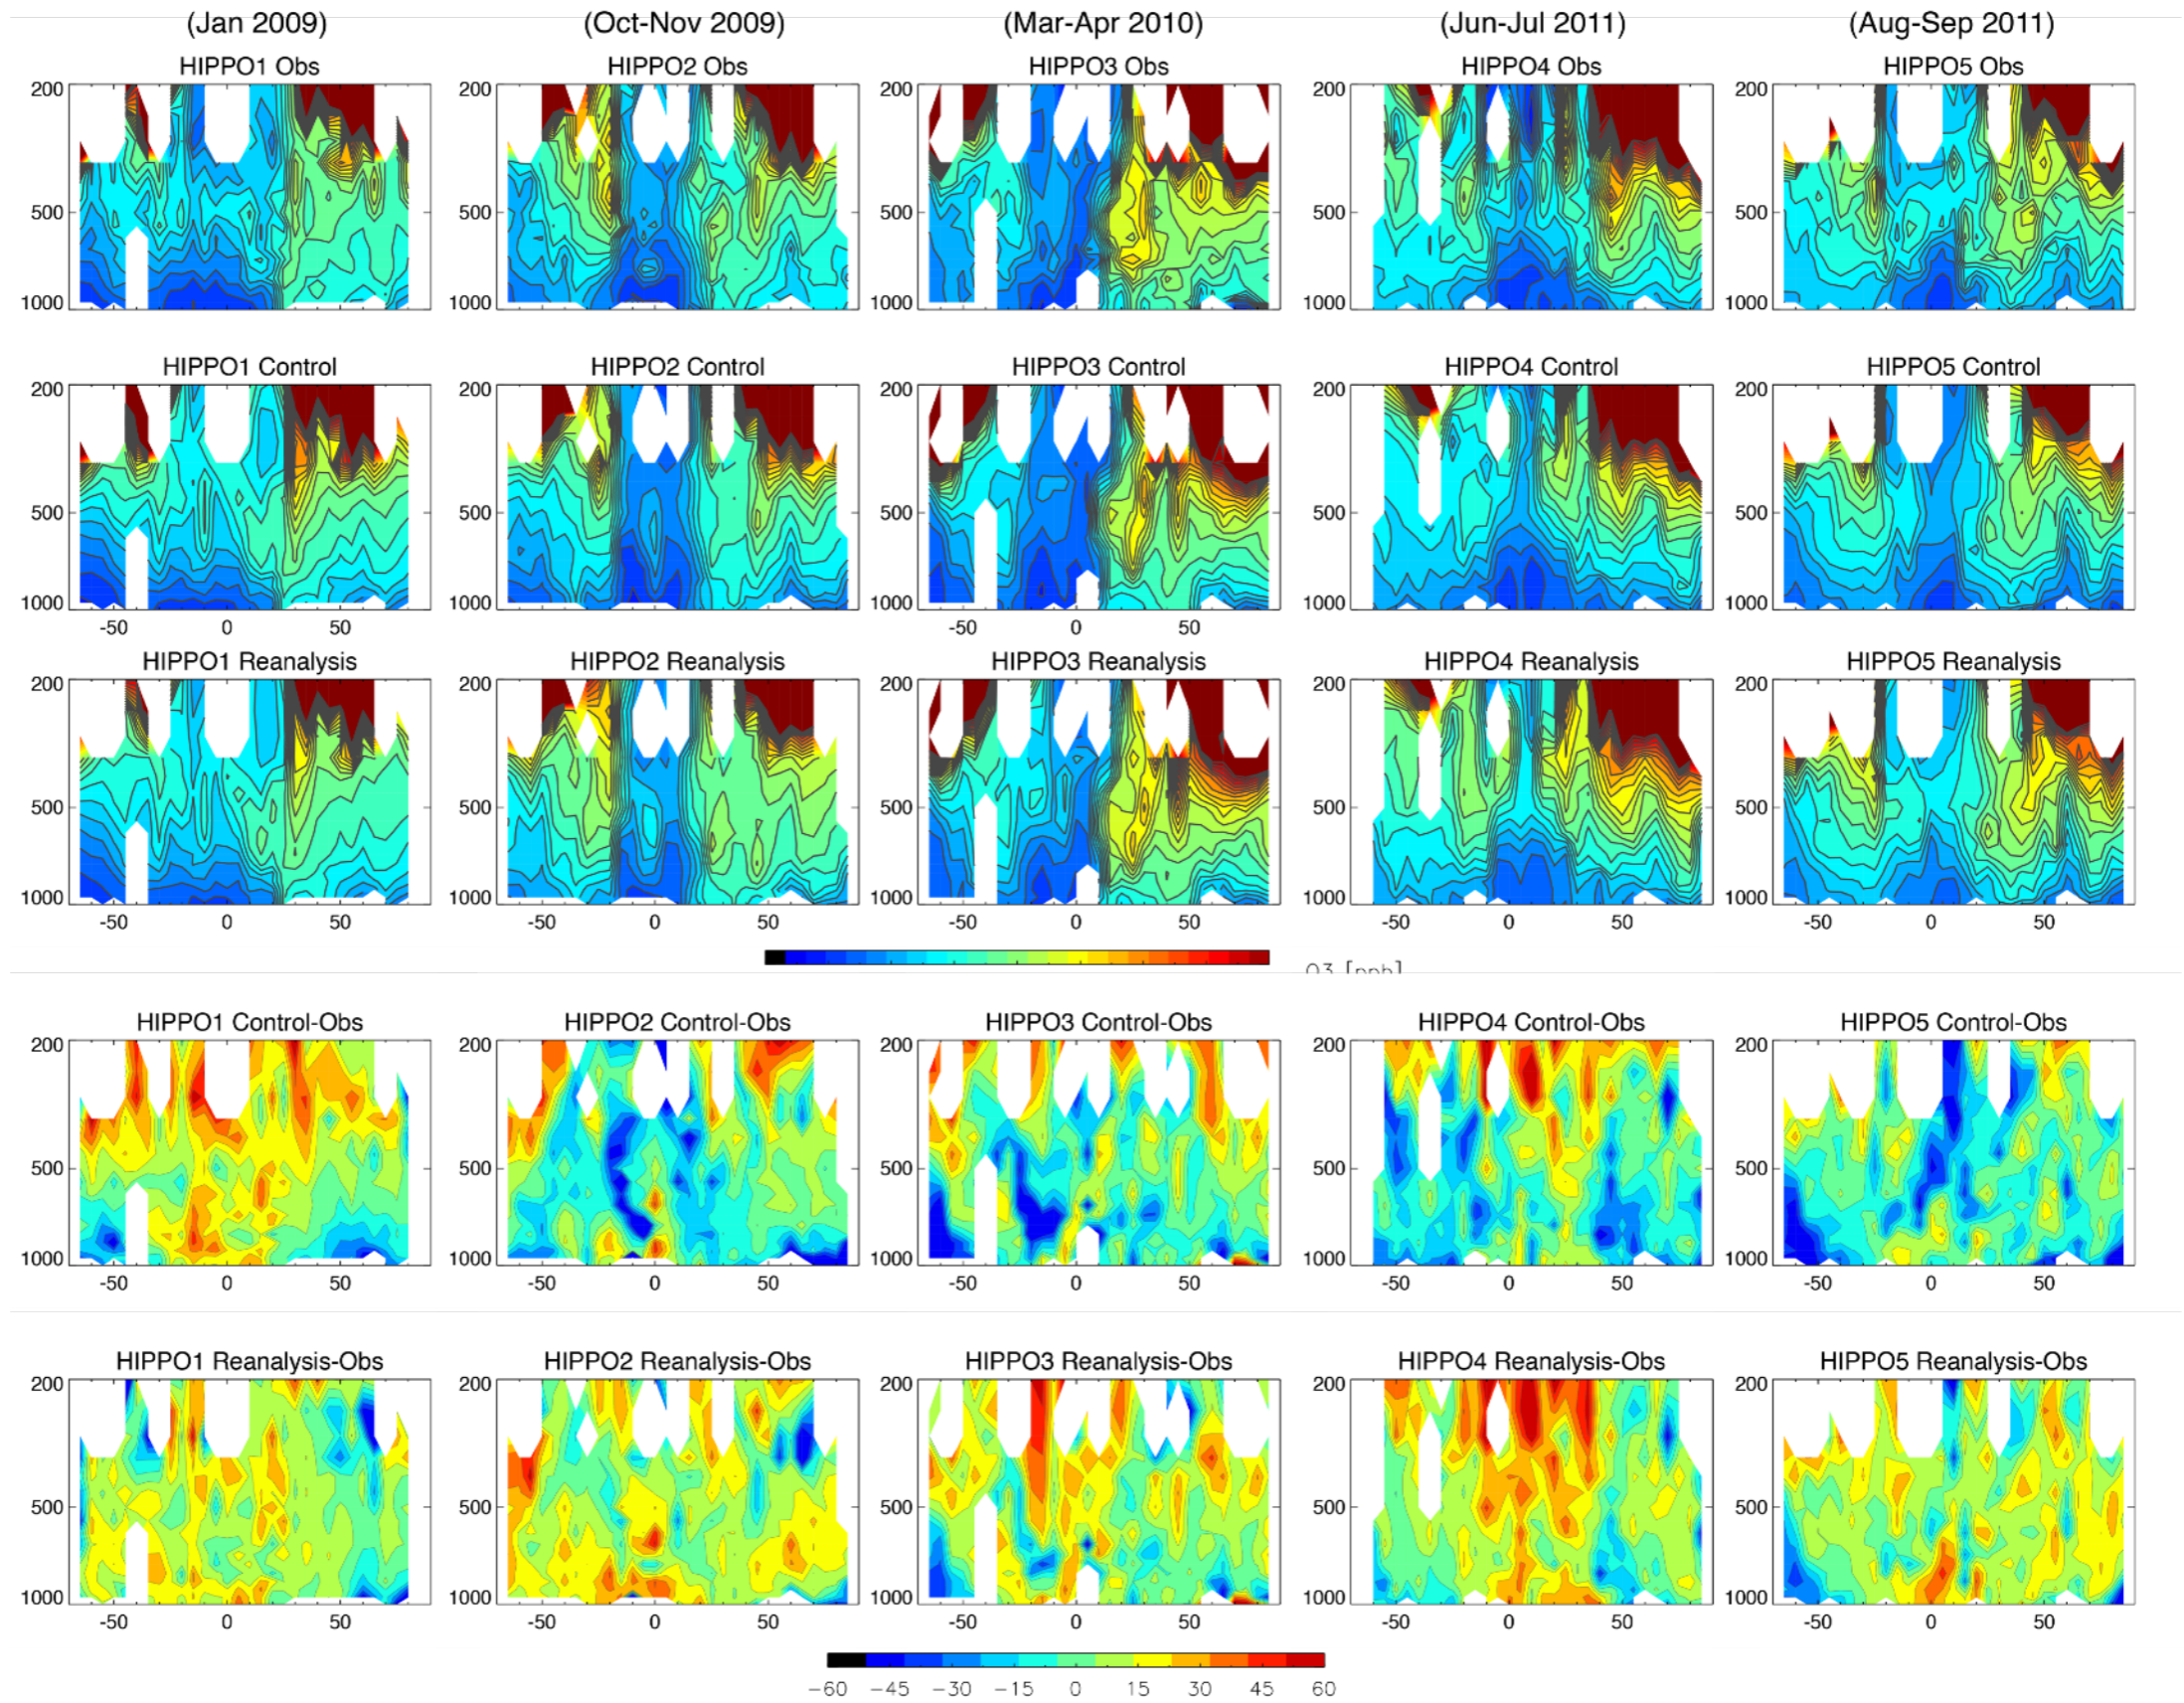

Fig. S2: Same as in Fig. S1, but for CO concentration (in ppb, from first to third row) and its absolute difference (in ppb, from fourth to fifth row) obtained from HIPPO aircraft measurements.

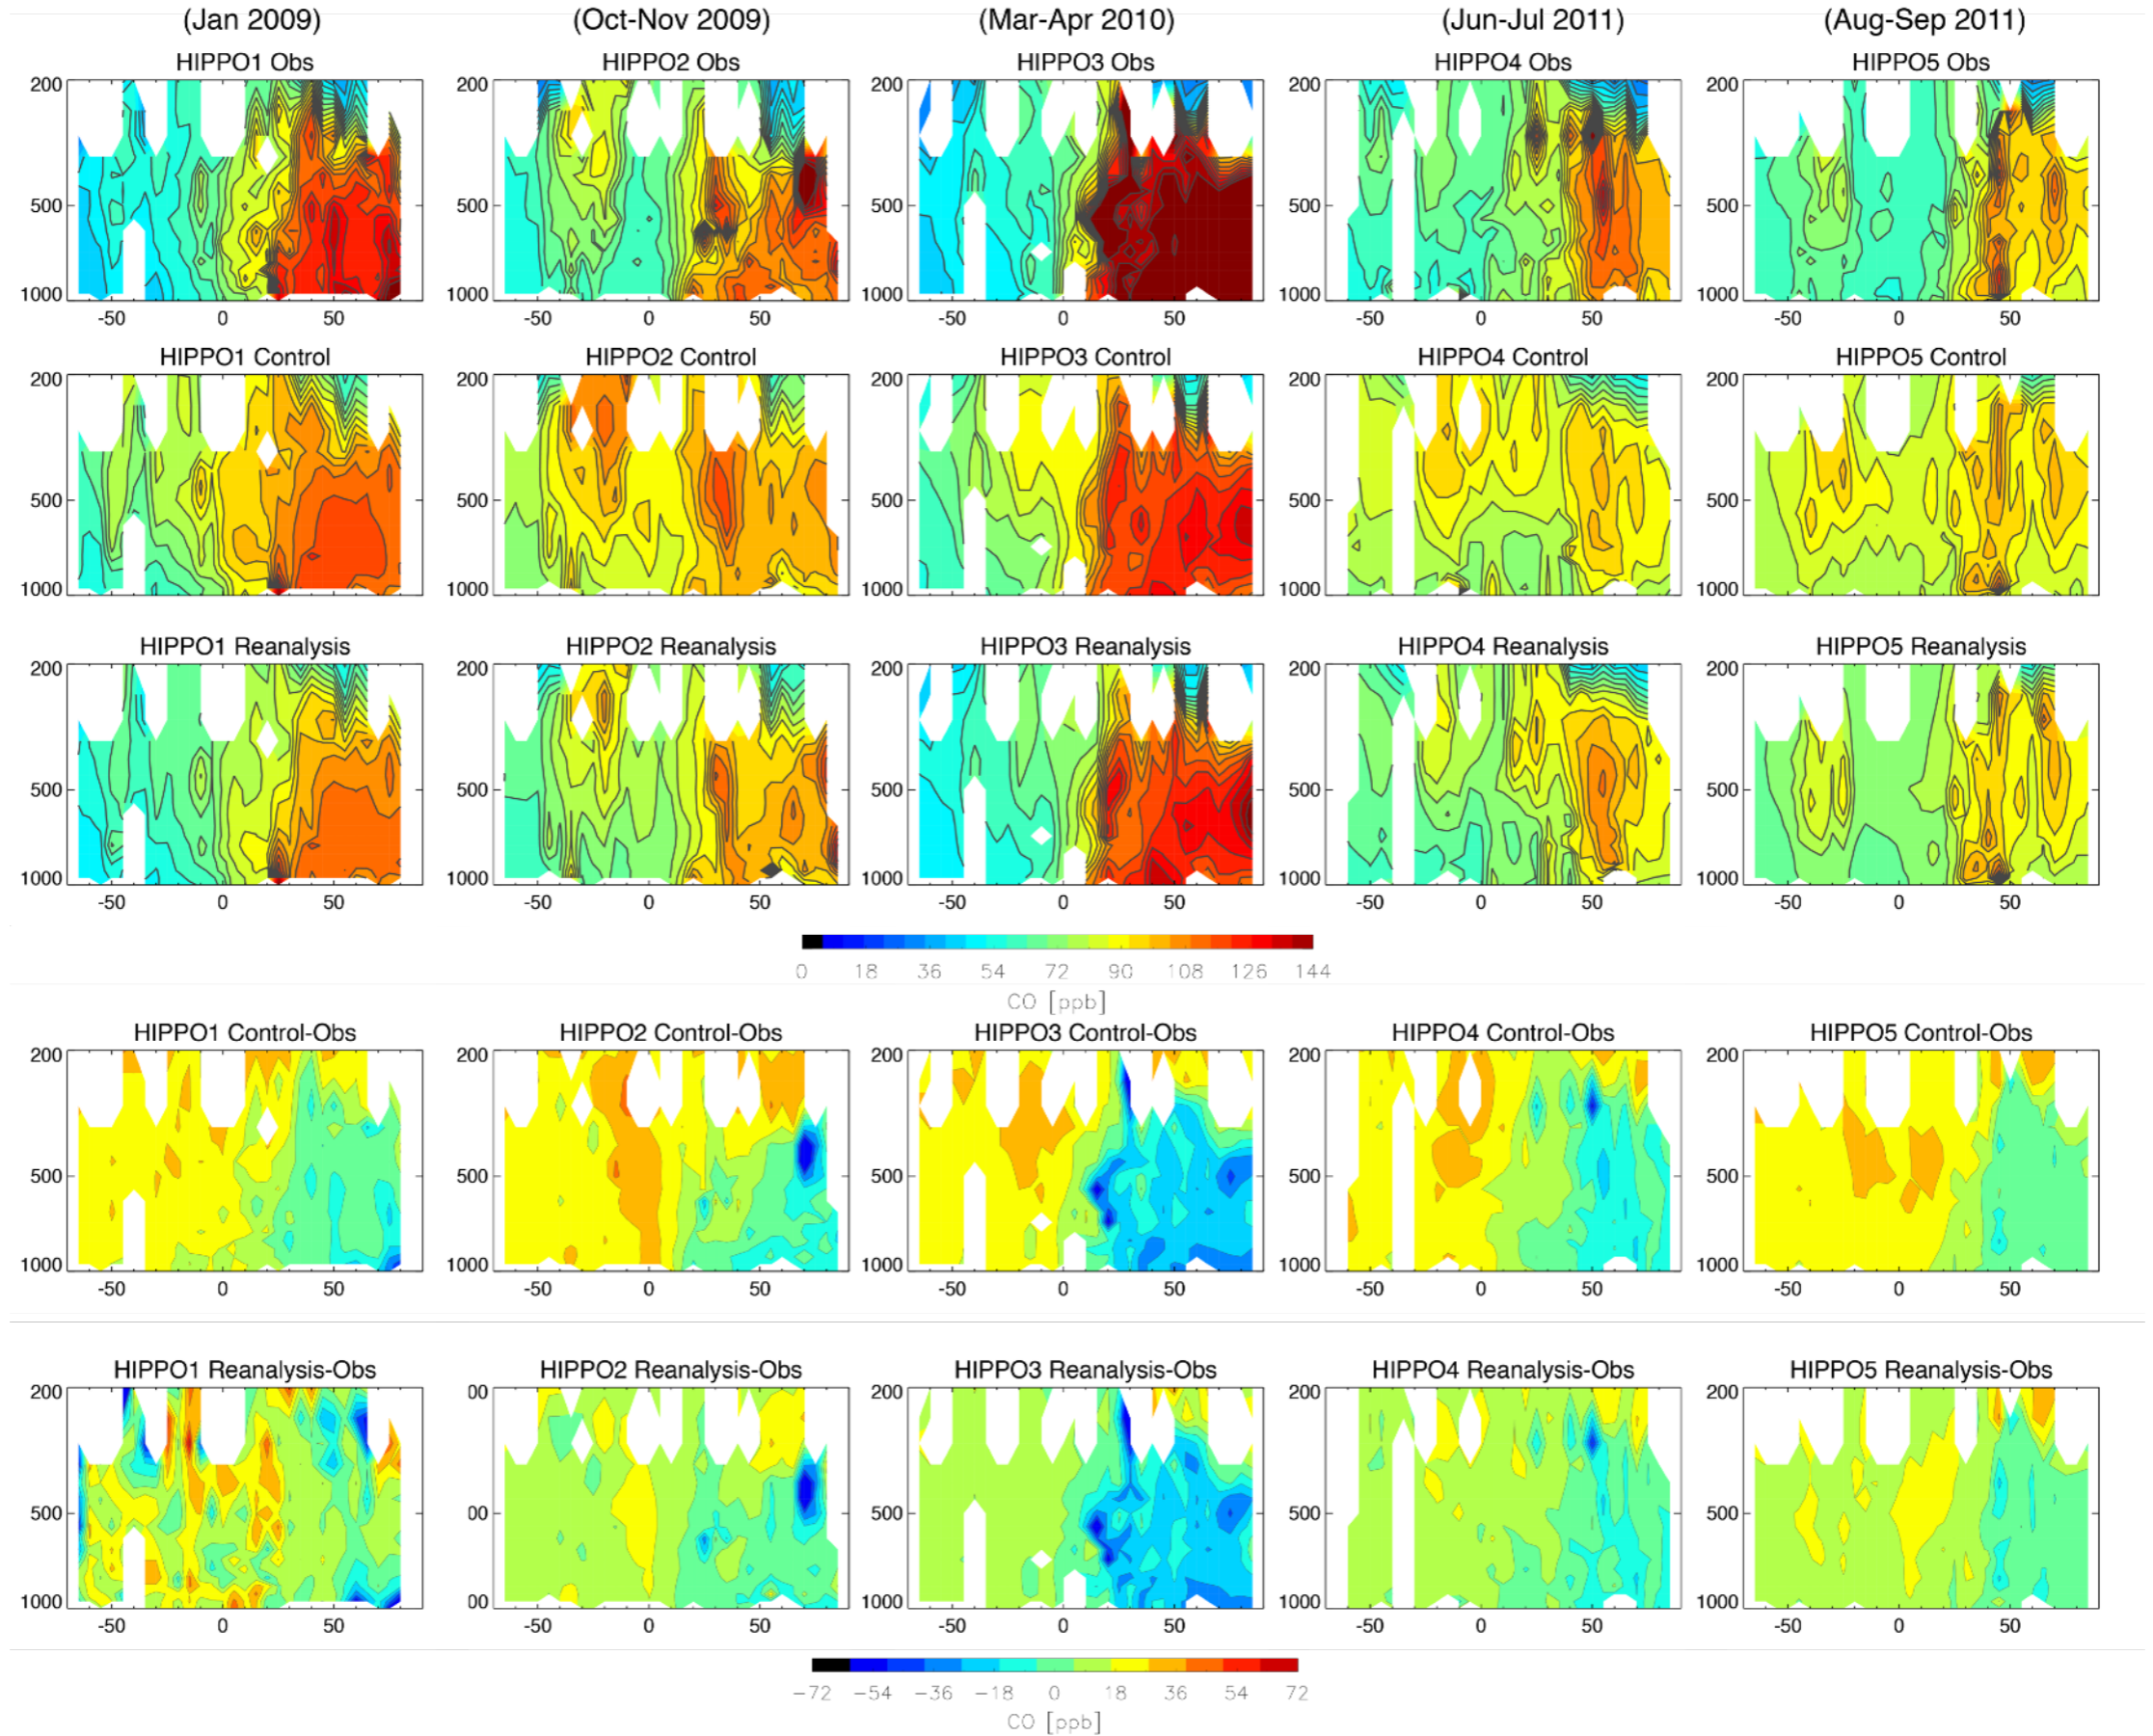

Fig. S3: Anomaly of annual mean tropospheric OH concentration from the 14-year mean (2005-2018) in TCR-2.

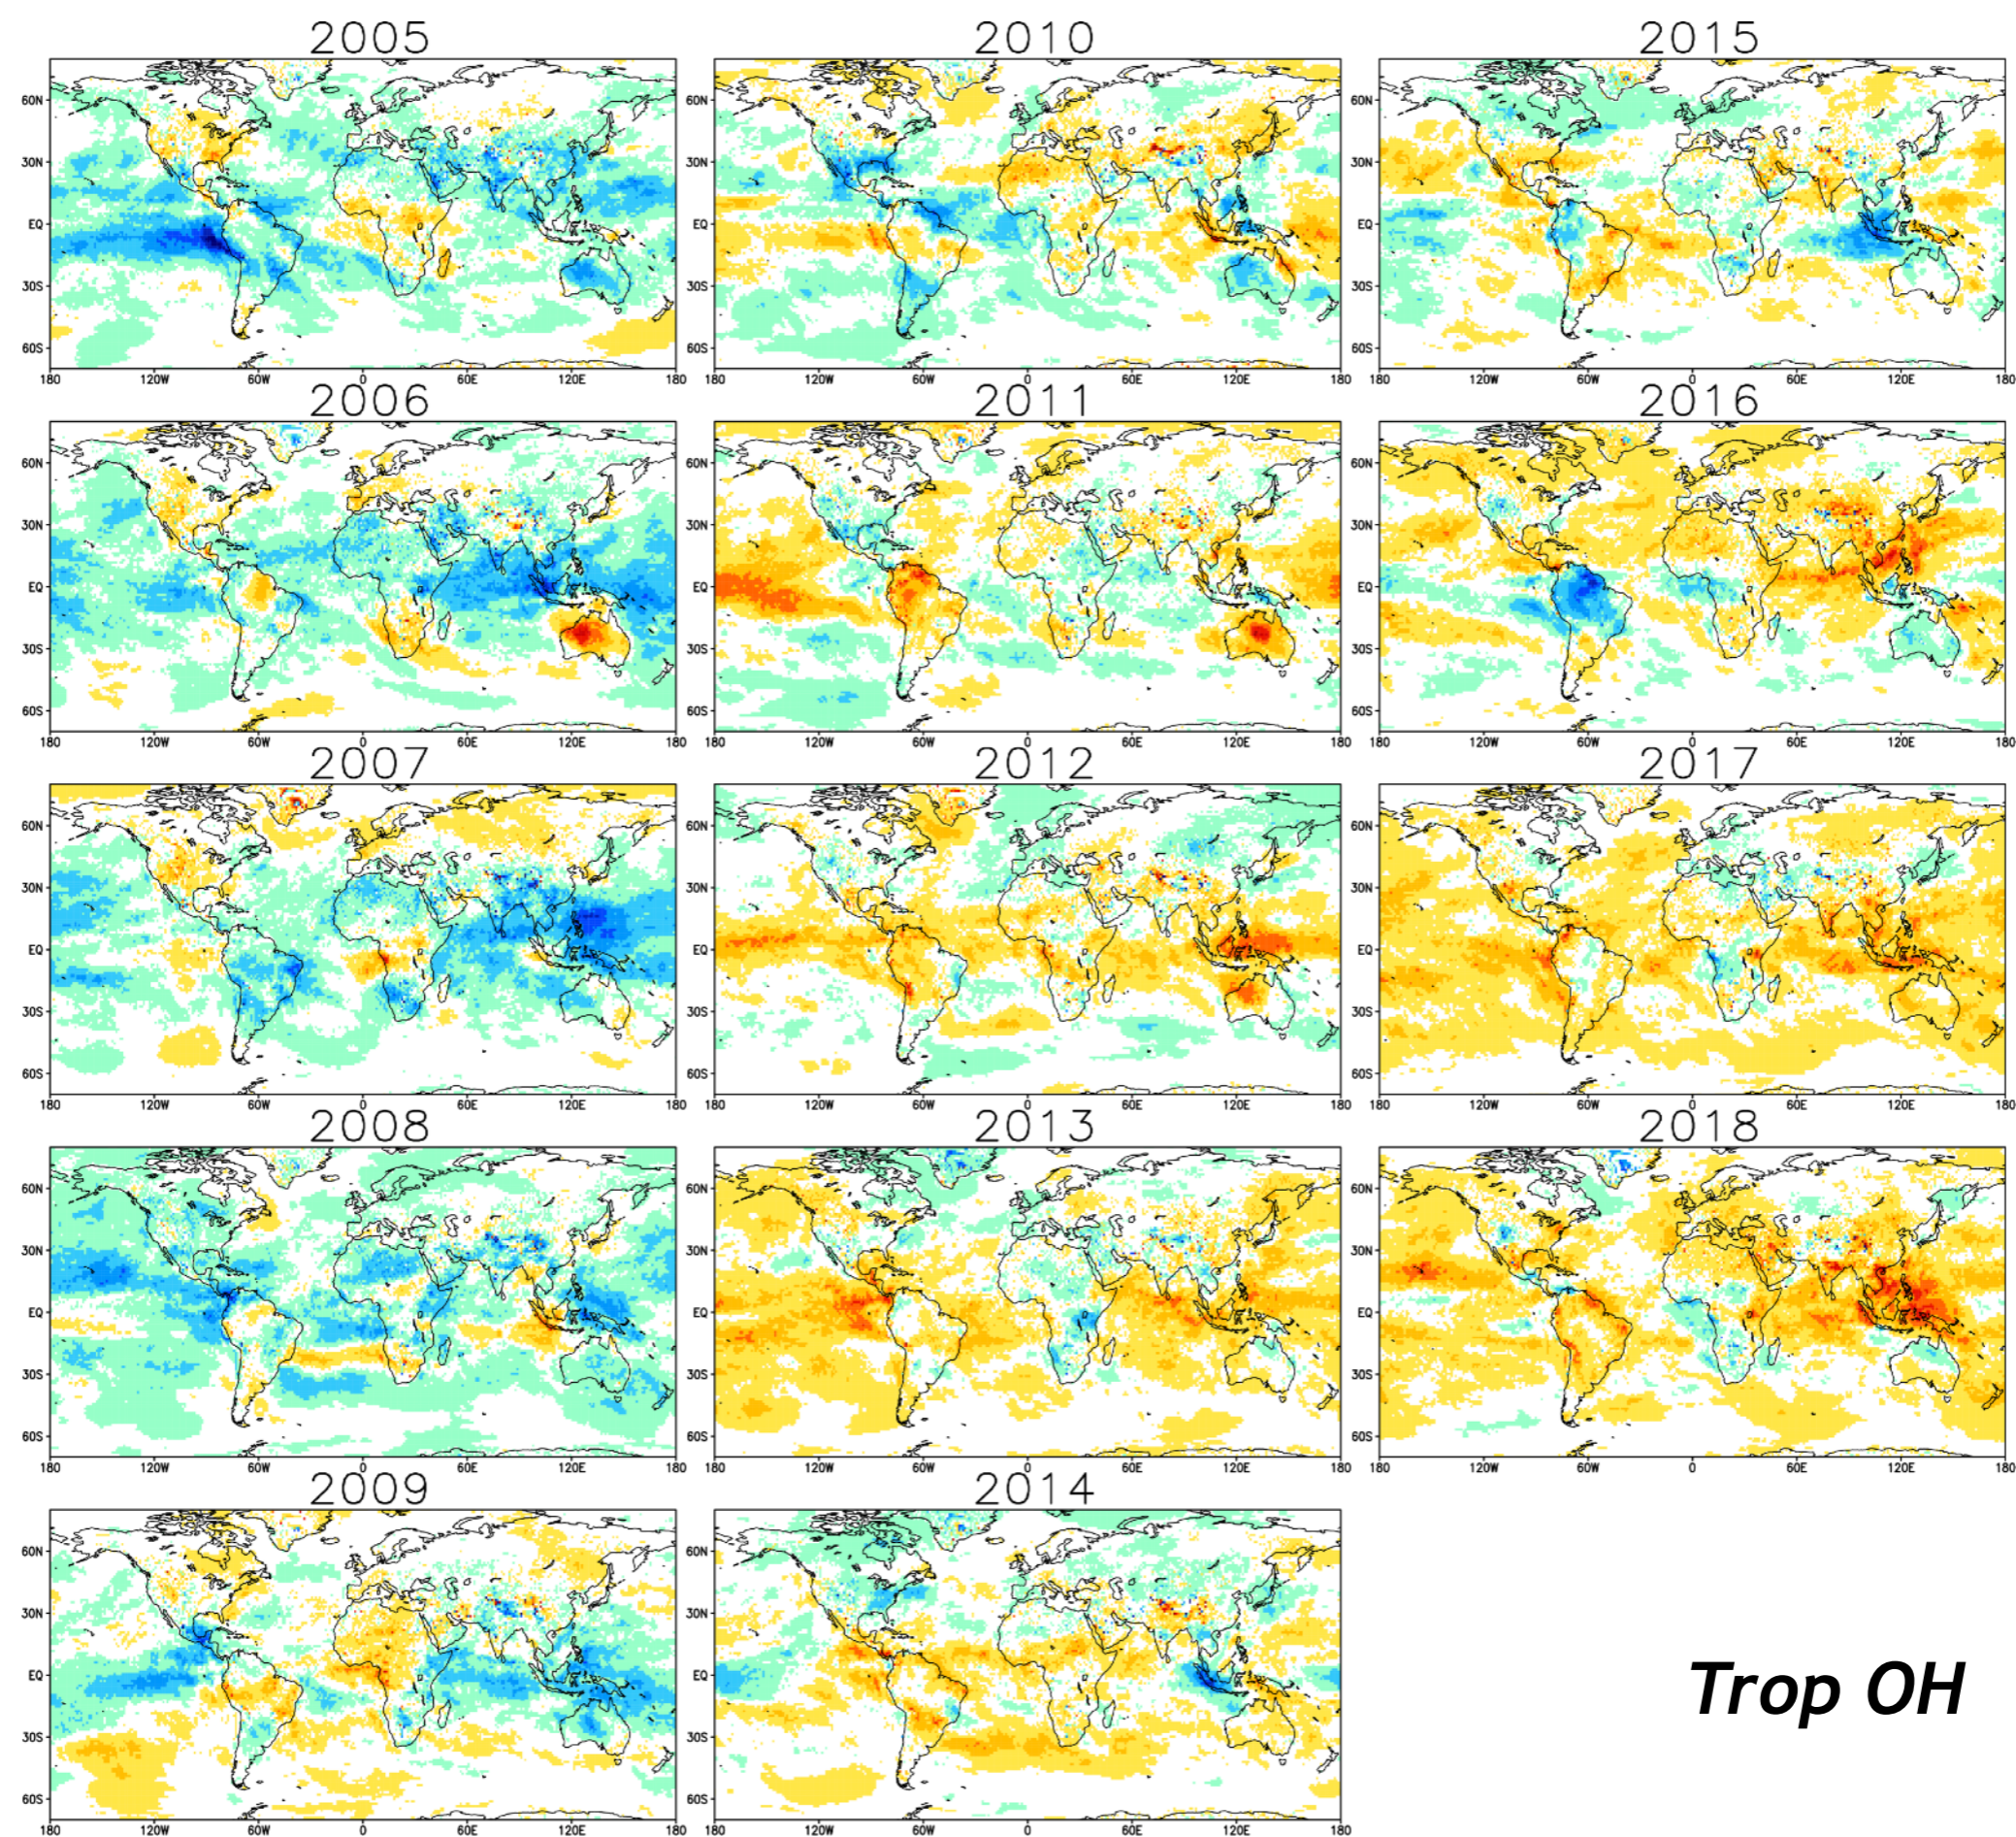

Fig. S4: Same as in Fig S3, but for the noTES reanalysis.

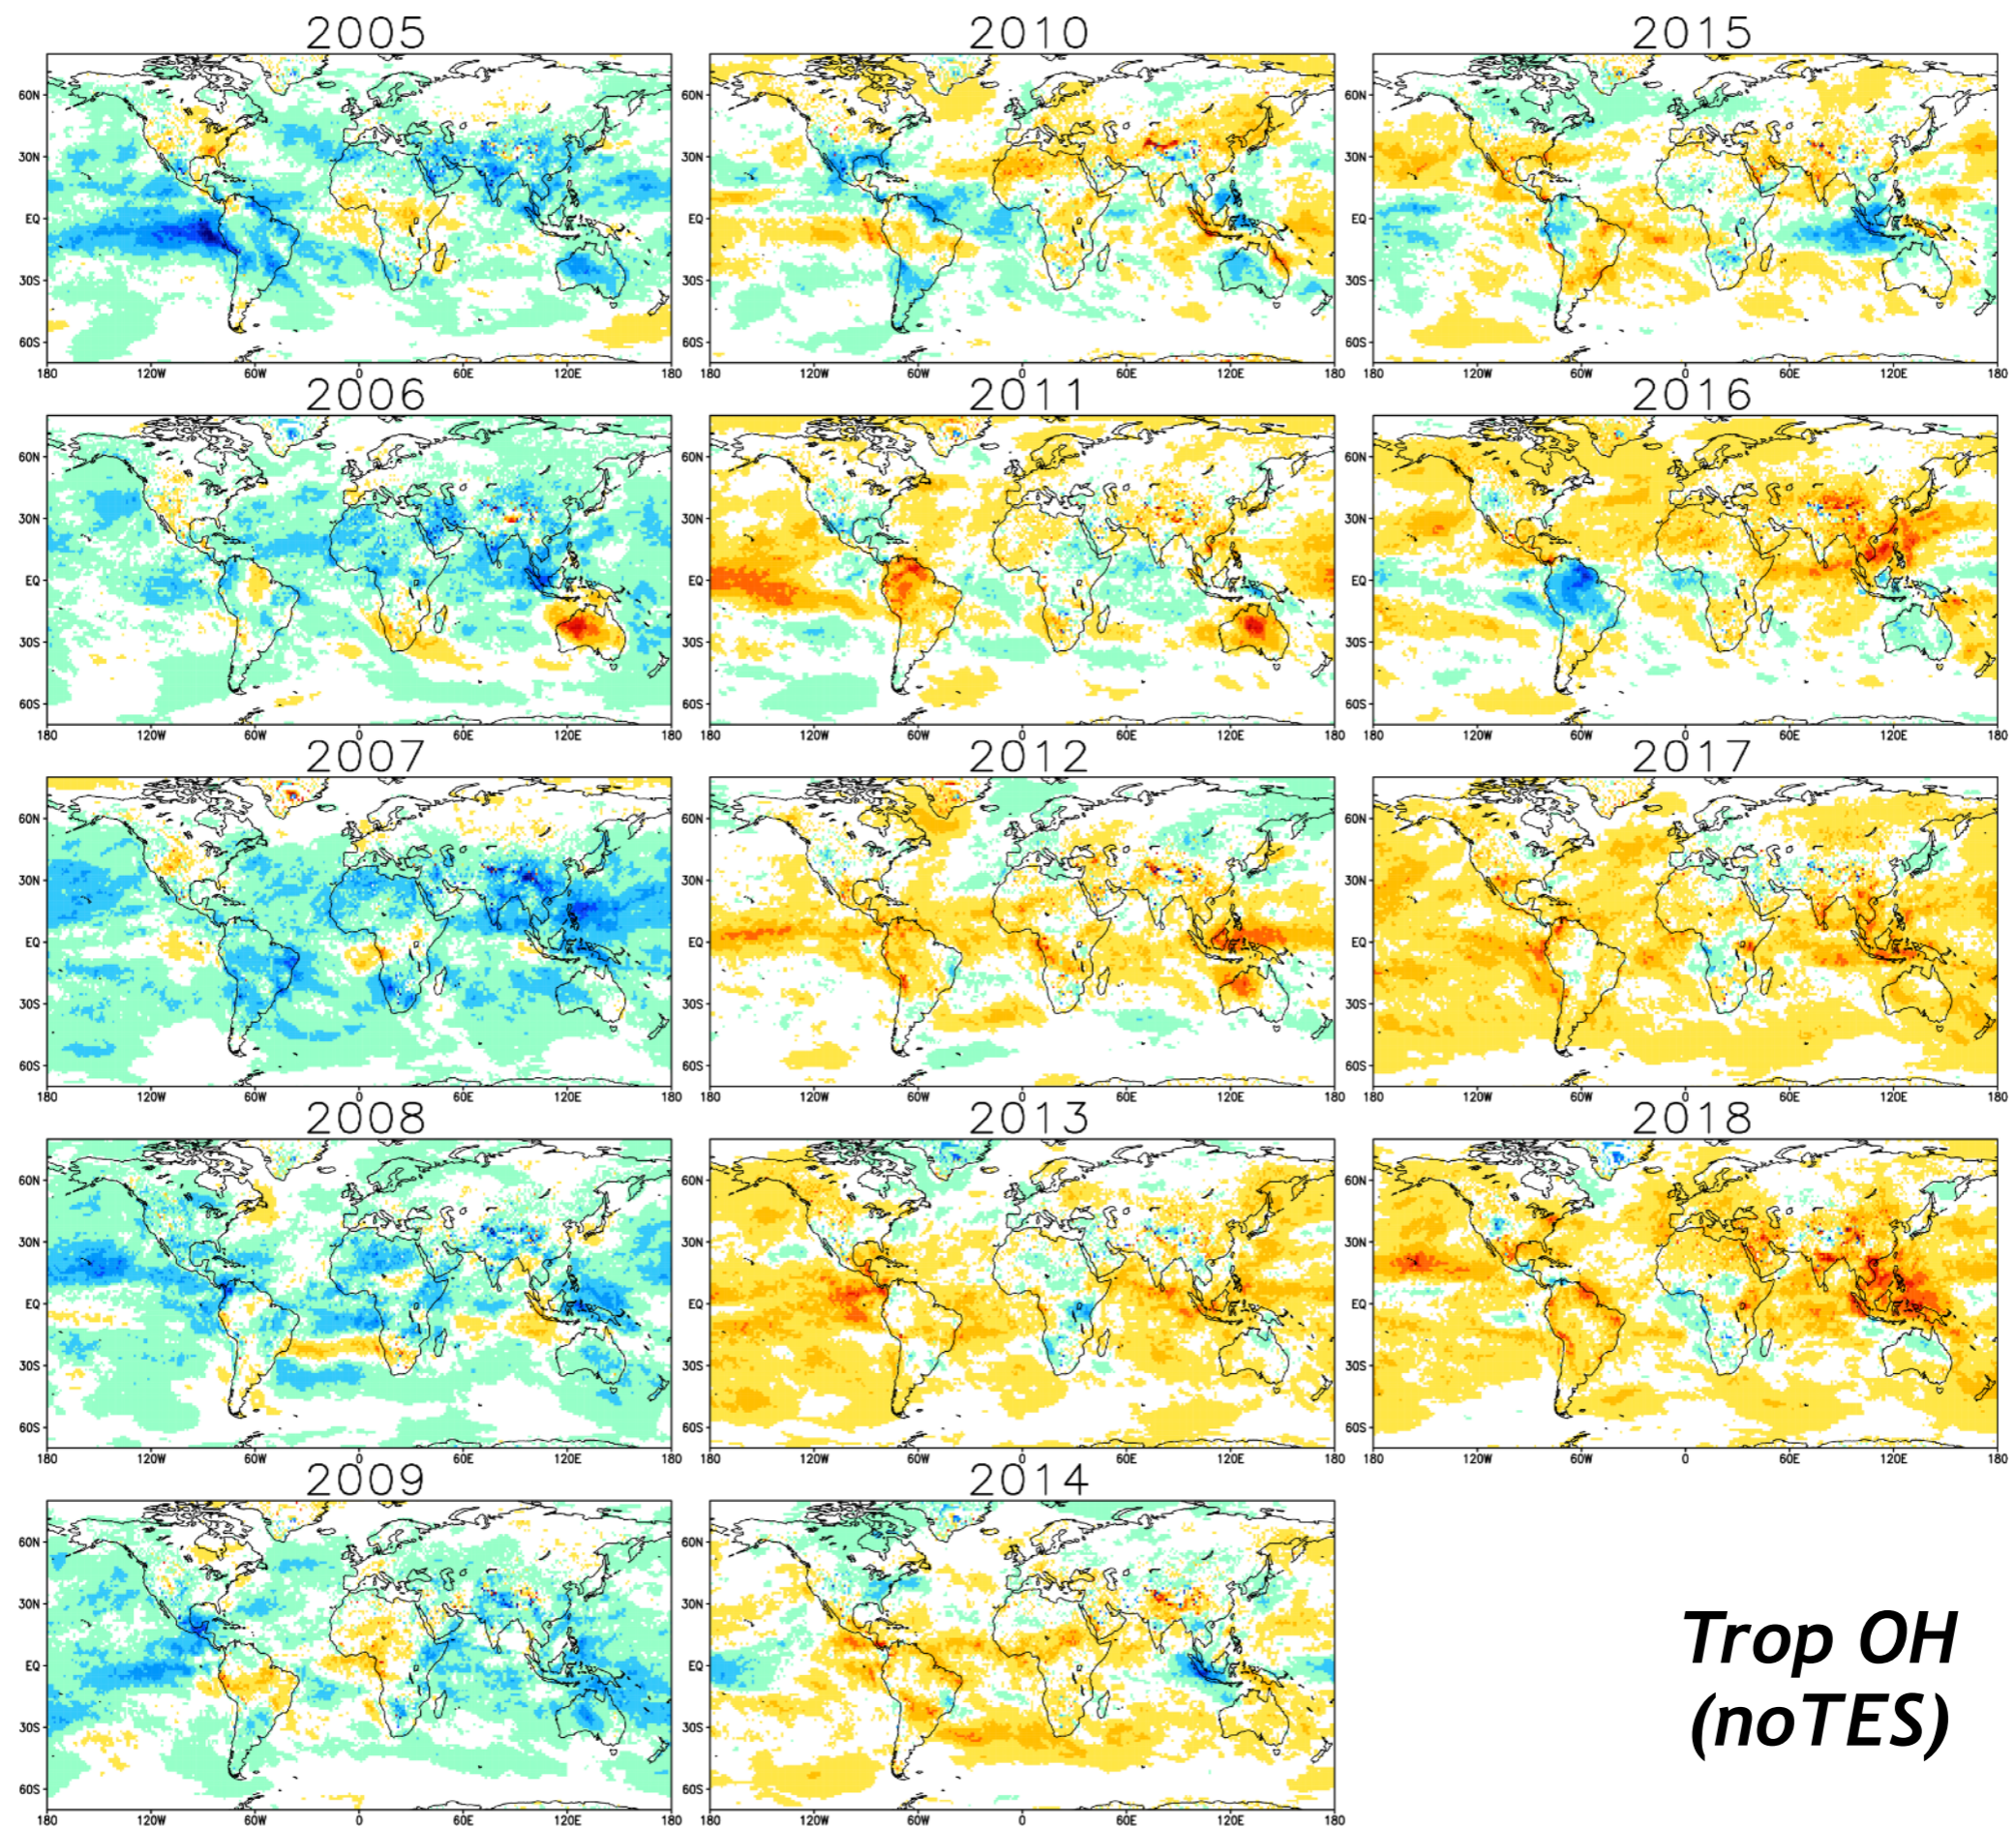

Fig. S5: Vertical profiles of OH concentrations (pptv) from ATom measurements (black), control run (blue), and chemical reanalysis from ATom-1 in August 2016 and ATom-2 in February 2017.

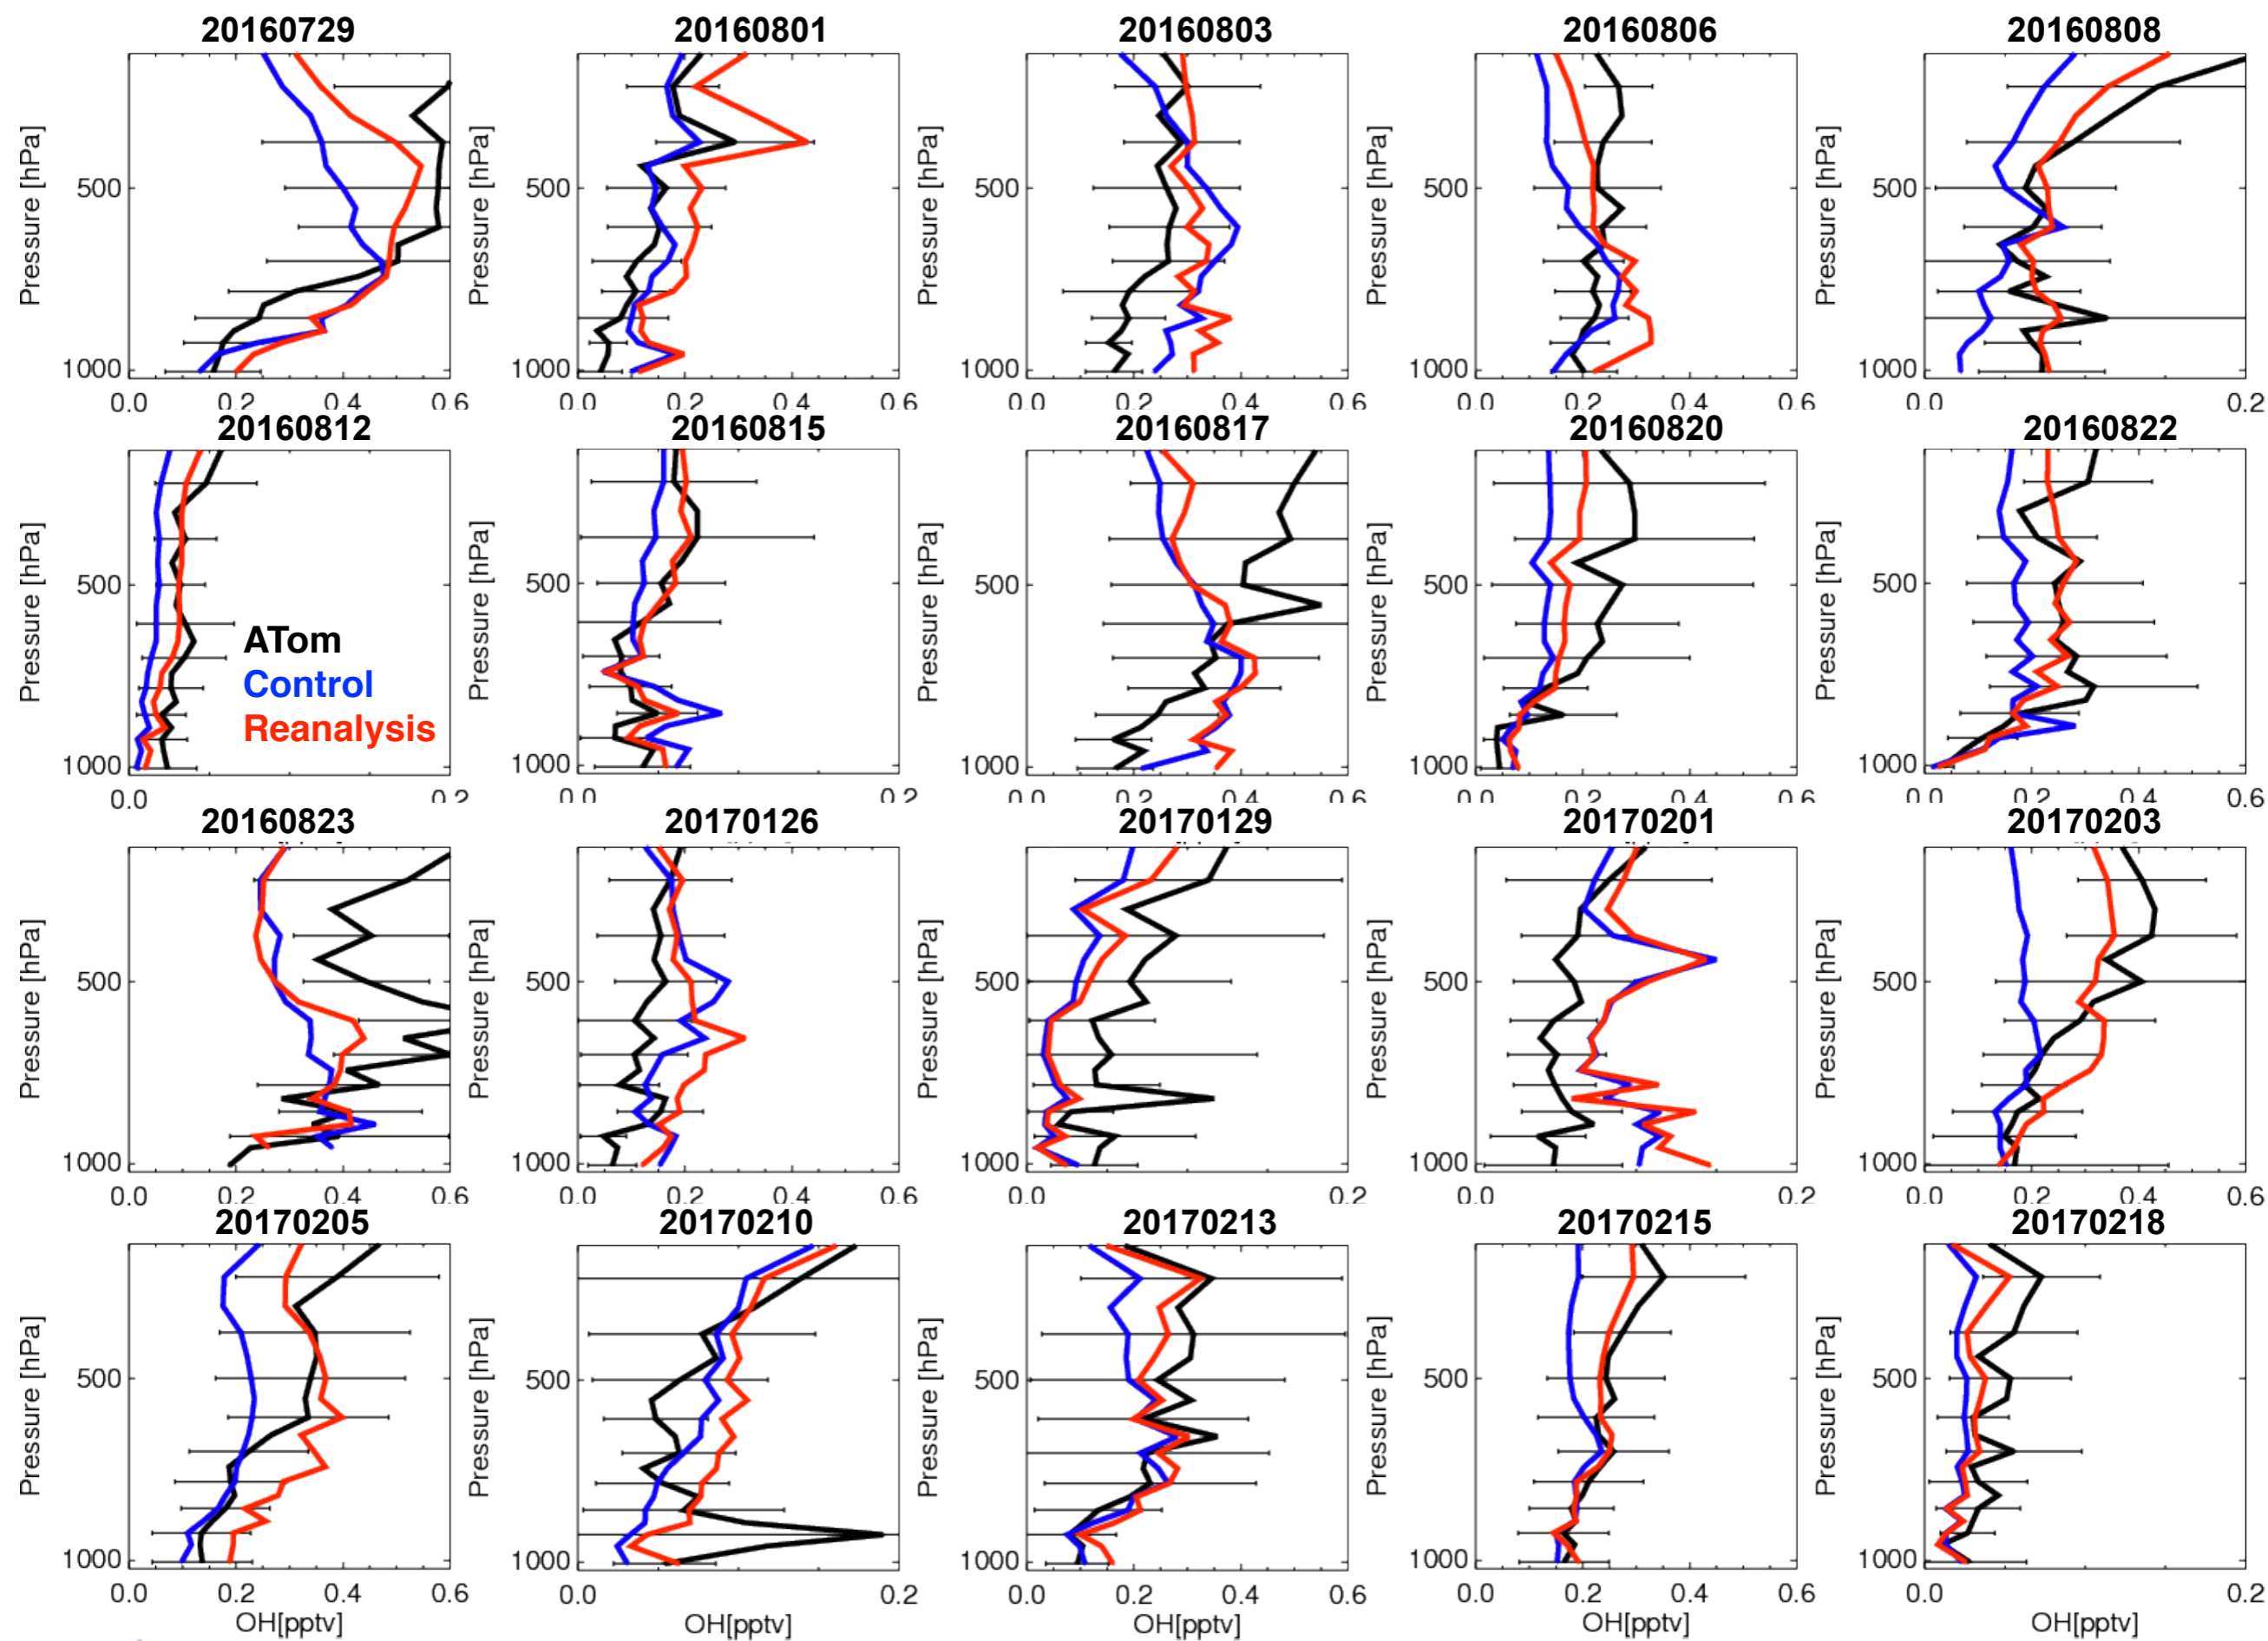

Fig. S6: Anomaly of annual mean surface NO<sub>x</sub> emissions (in  $10^{-11}$  kg N m<sup>-2</sup> s<sup>-1</sup>) from the 14-year mean (2005-2018) in TCR-2.

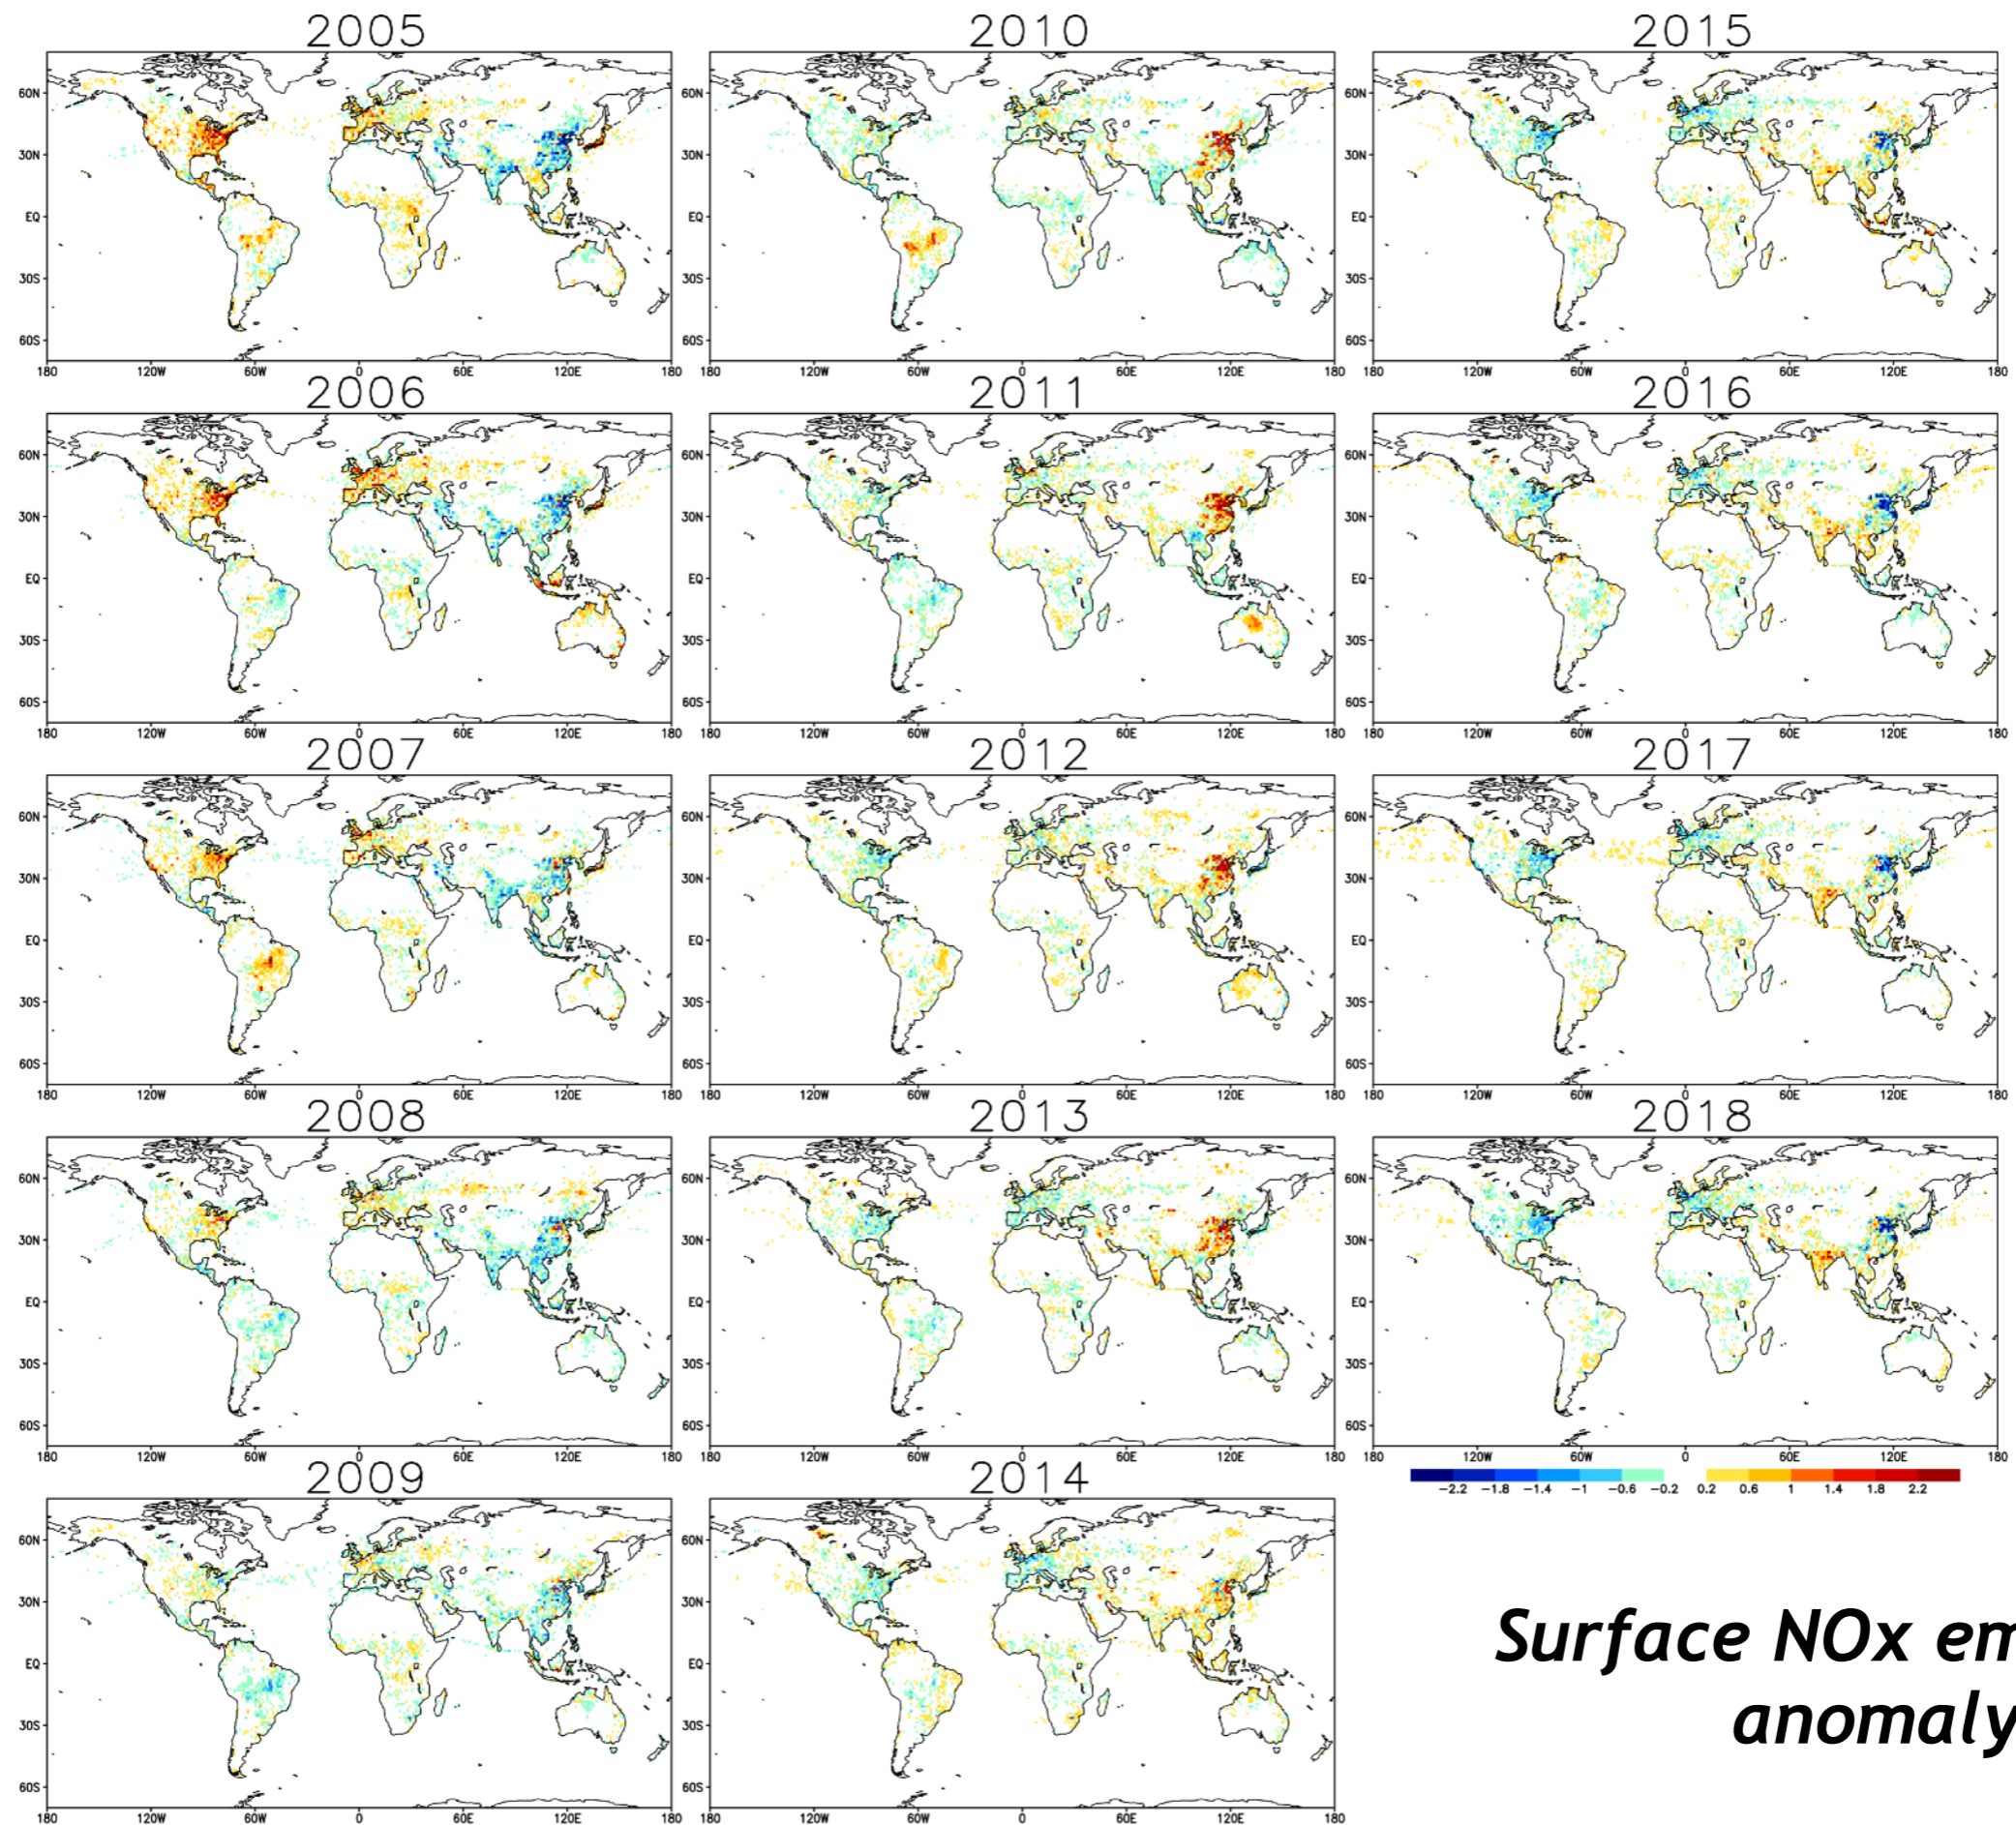

Fig. S7: Anomaly of annual mean surface CO emissions (in  $10^{-10}$  kg CO m<sup>-2</sup> s<sup>-1</sup>) from the 14-year mean (2005-2018) in TCR-2.

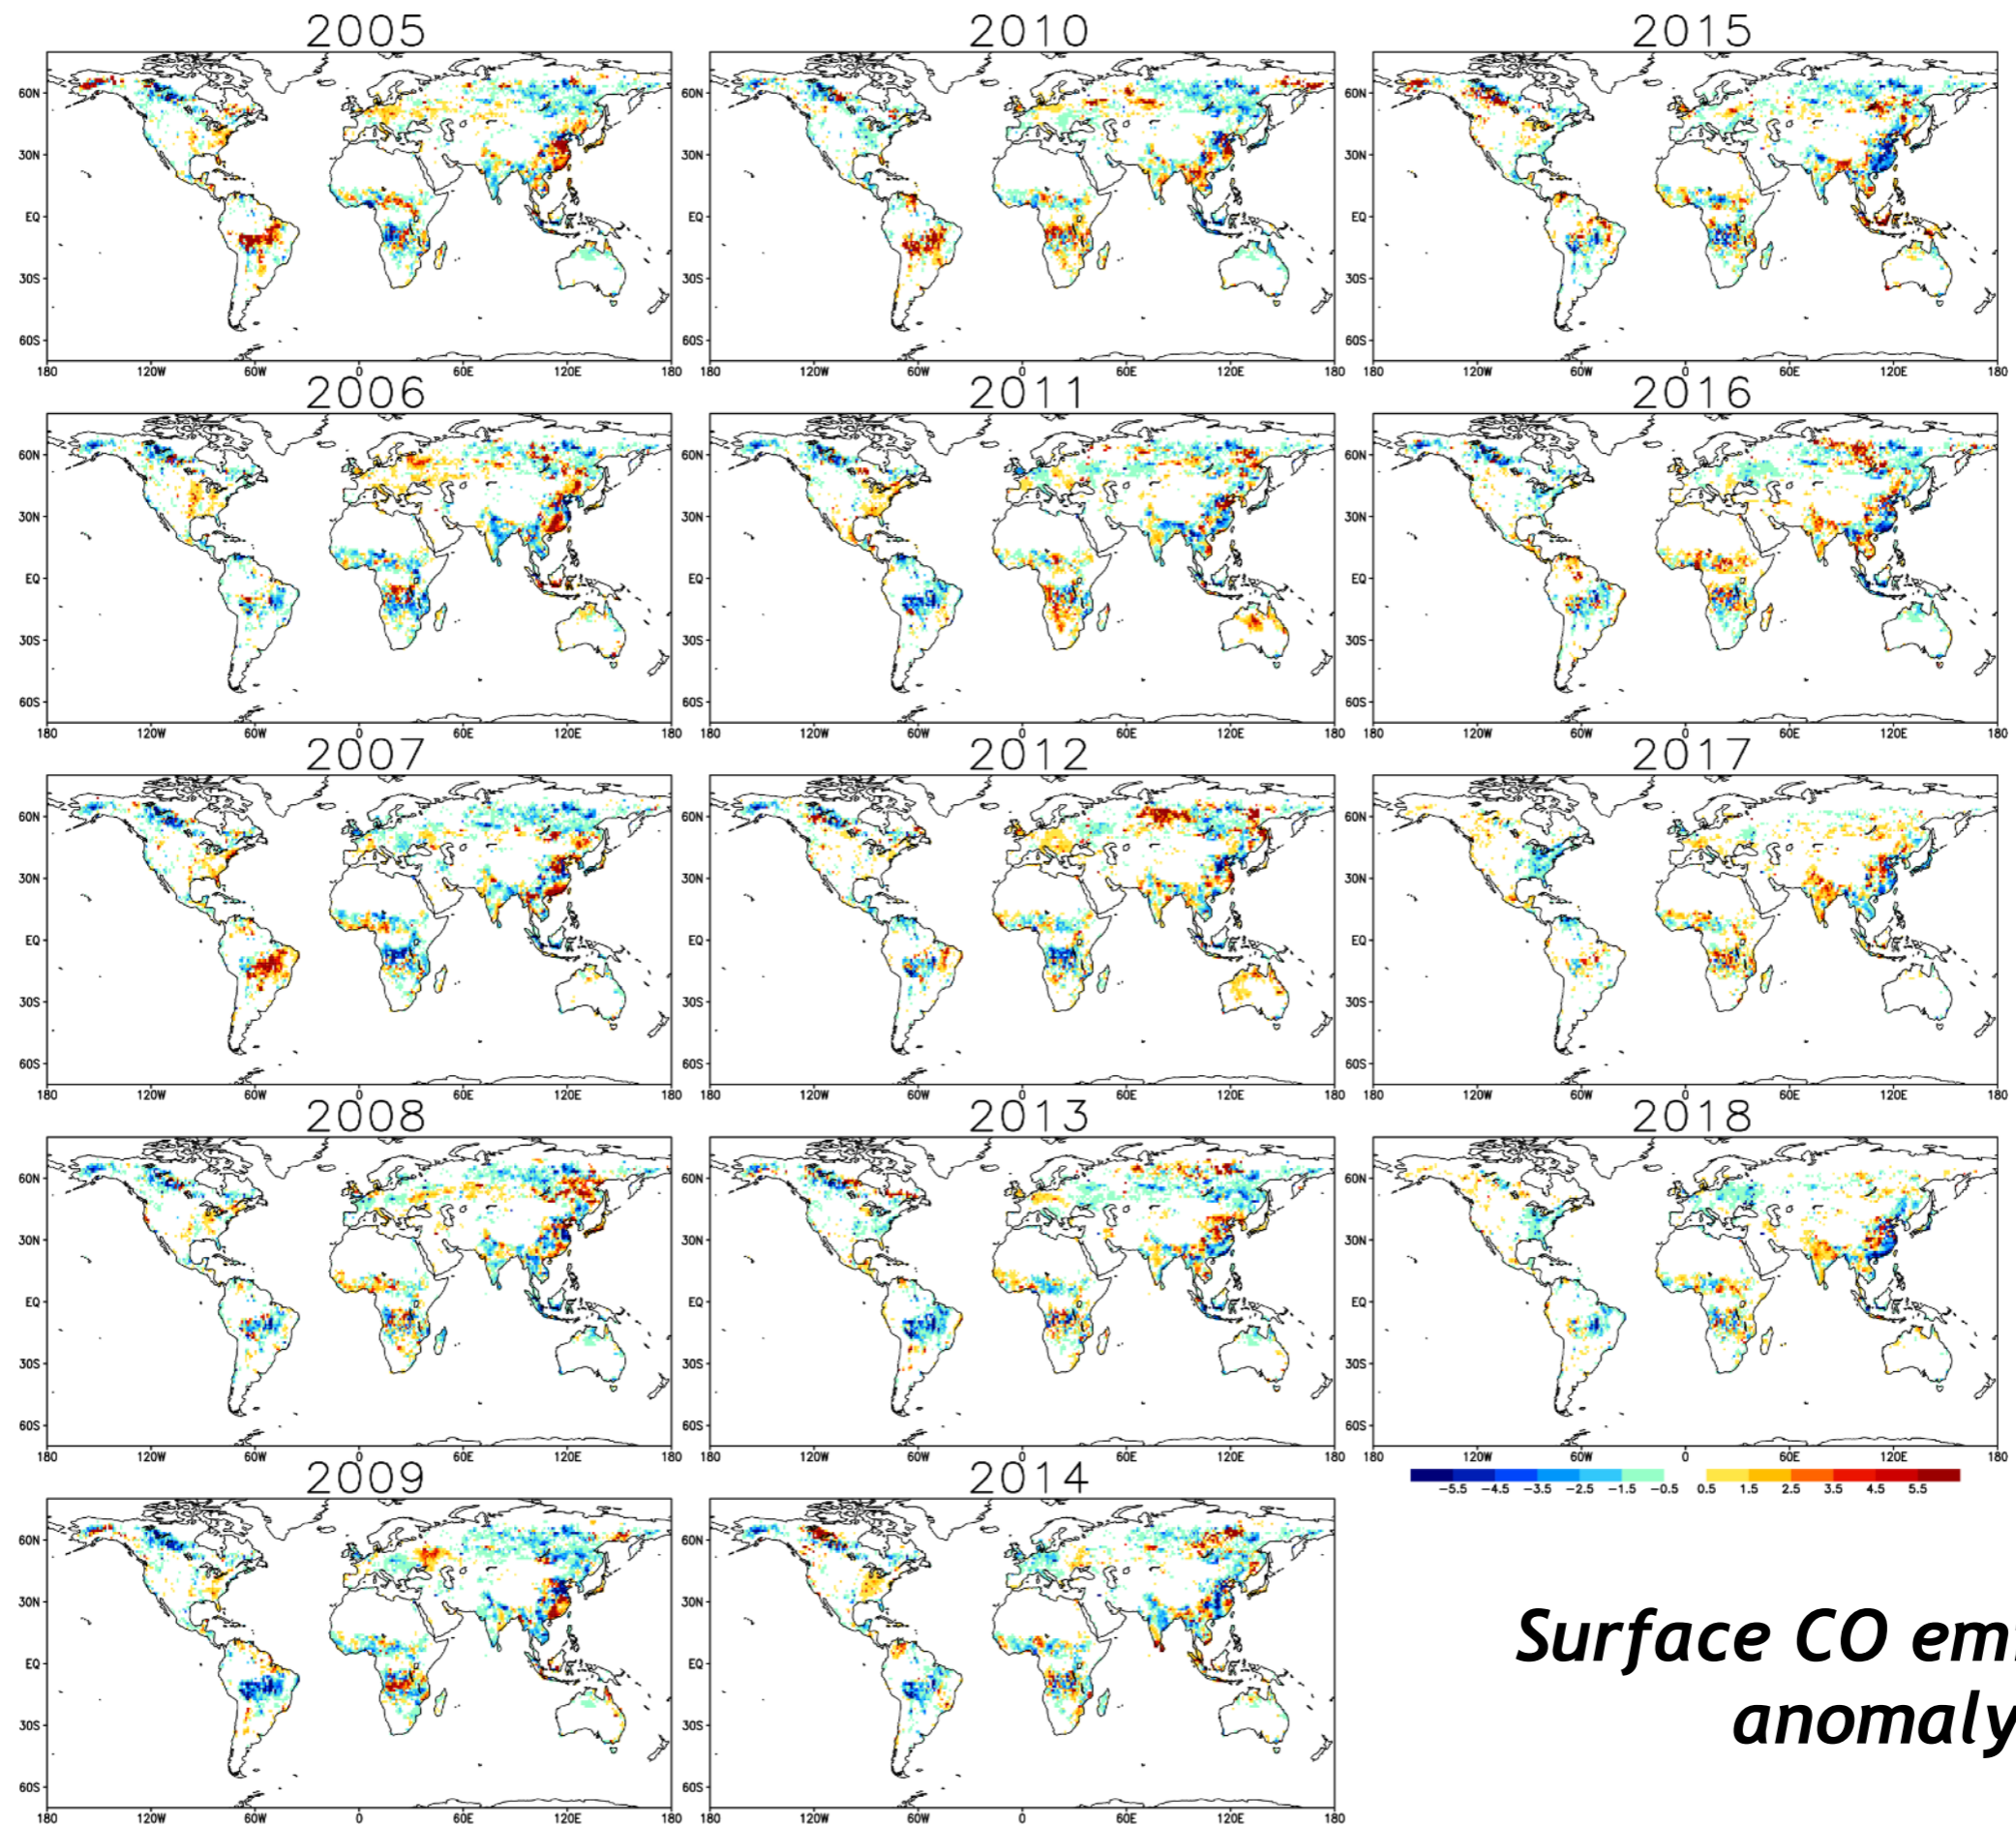

***Surface CO emissions  
anomaly***

Fig. S8: Anomaly of annual mean surface SO<sub>2</sub> emissions (in 10<sup>-12</sup> kg S m<sup>-2</sup> s<sup>-1</sup>) from the 14-year mean (2005-2018) in TCR-2.

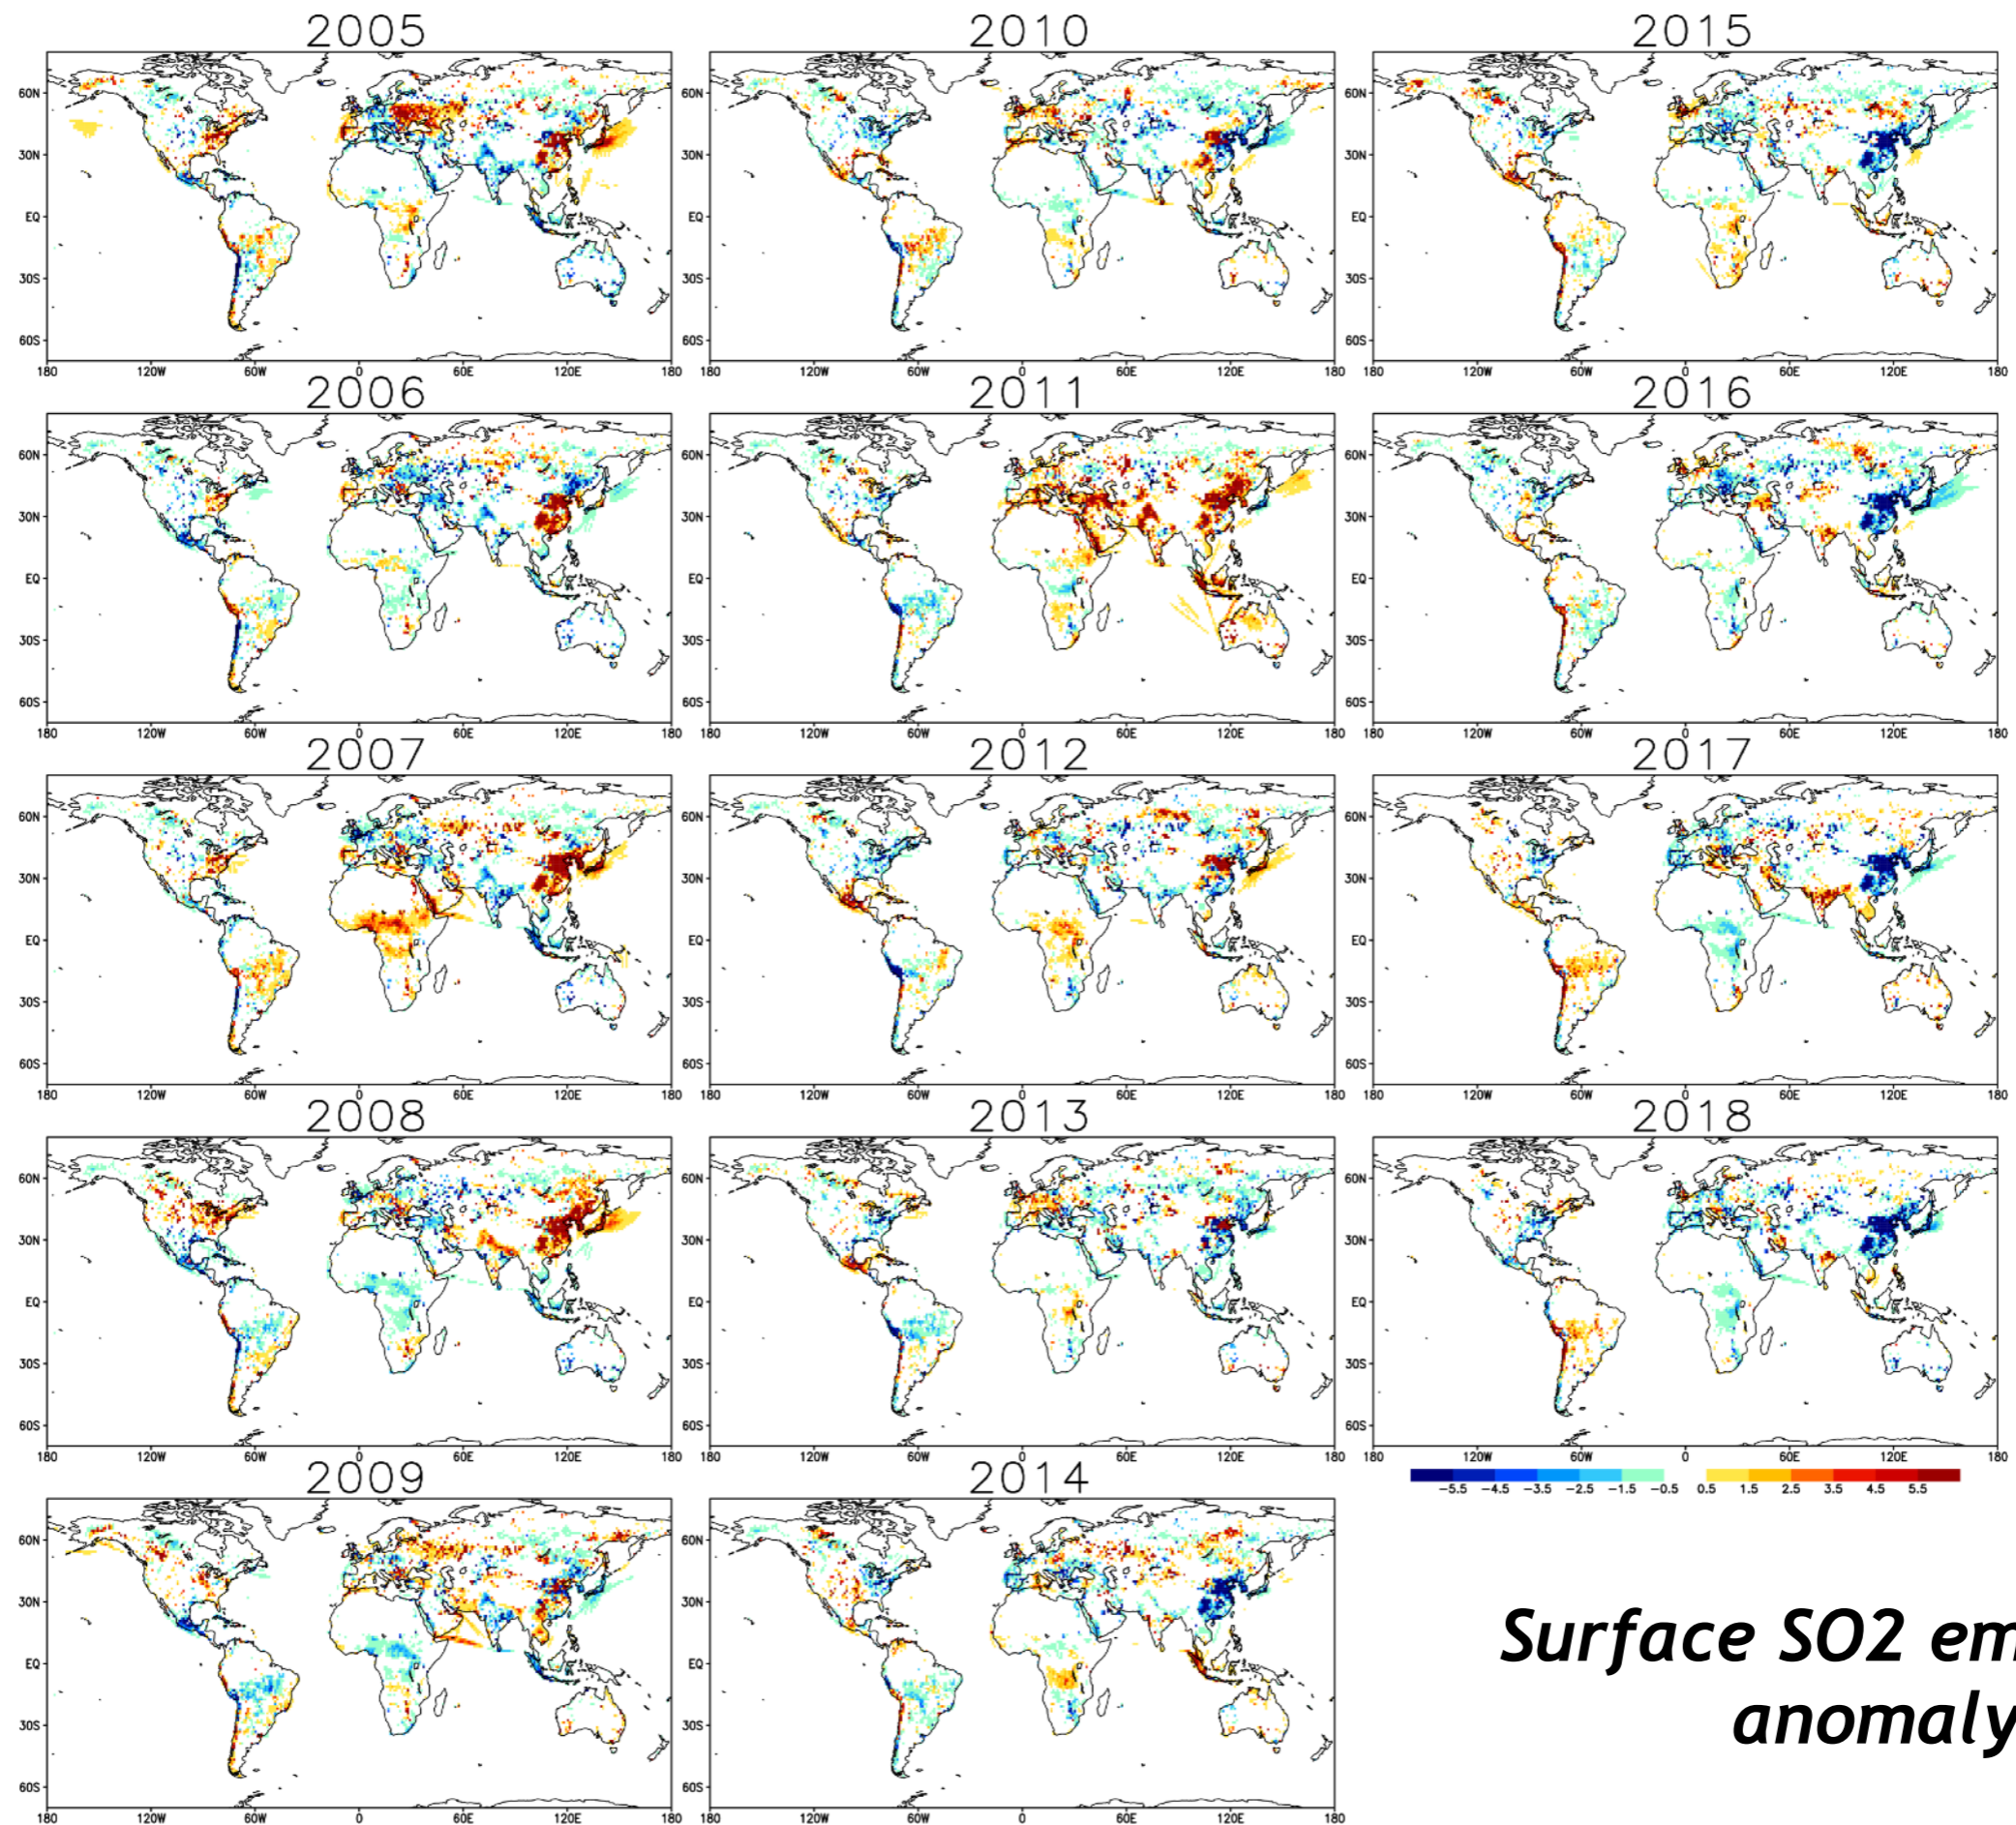

Fig. S9: Anomaly of annual mean lightning NO<sub>x</sub> sources (in  $10^{-12}$  kg N m<sup>-2</sup> s<sup>-1</sup>) from the 14-year mean (2005-2018) in TCR-2.

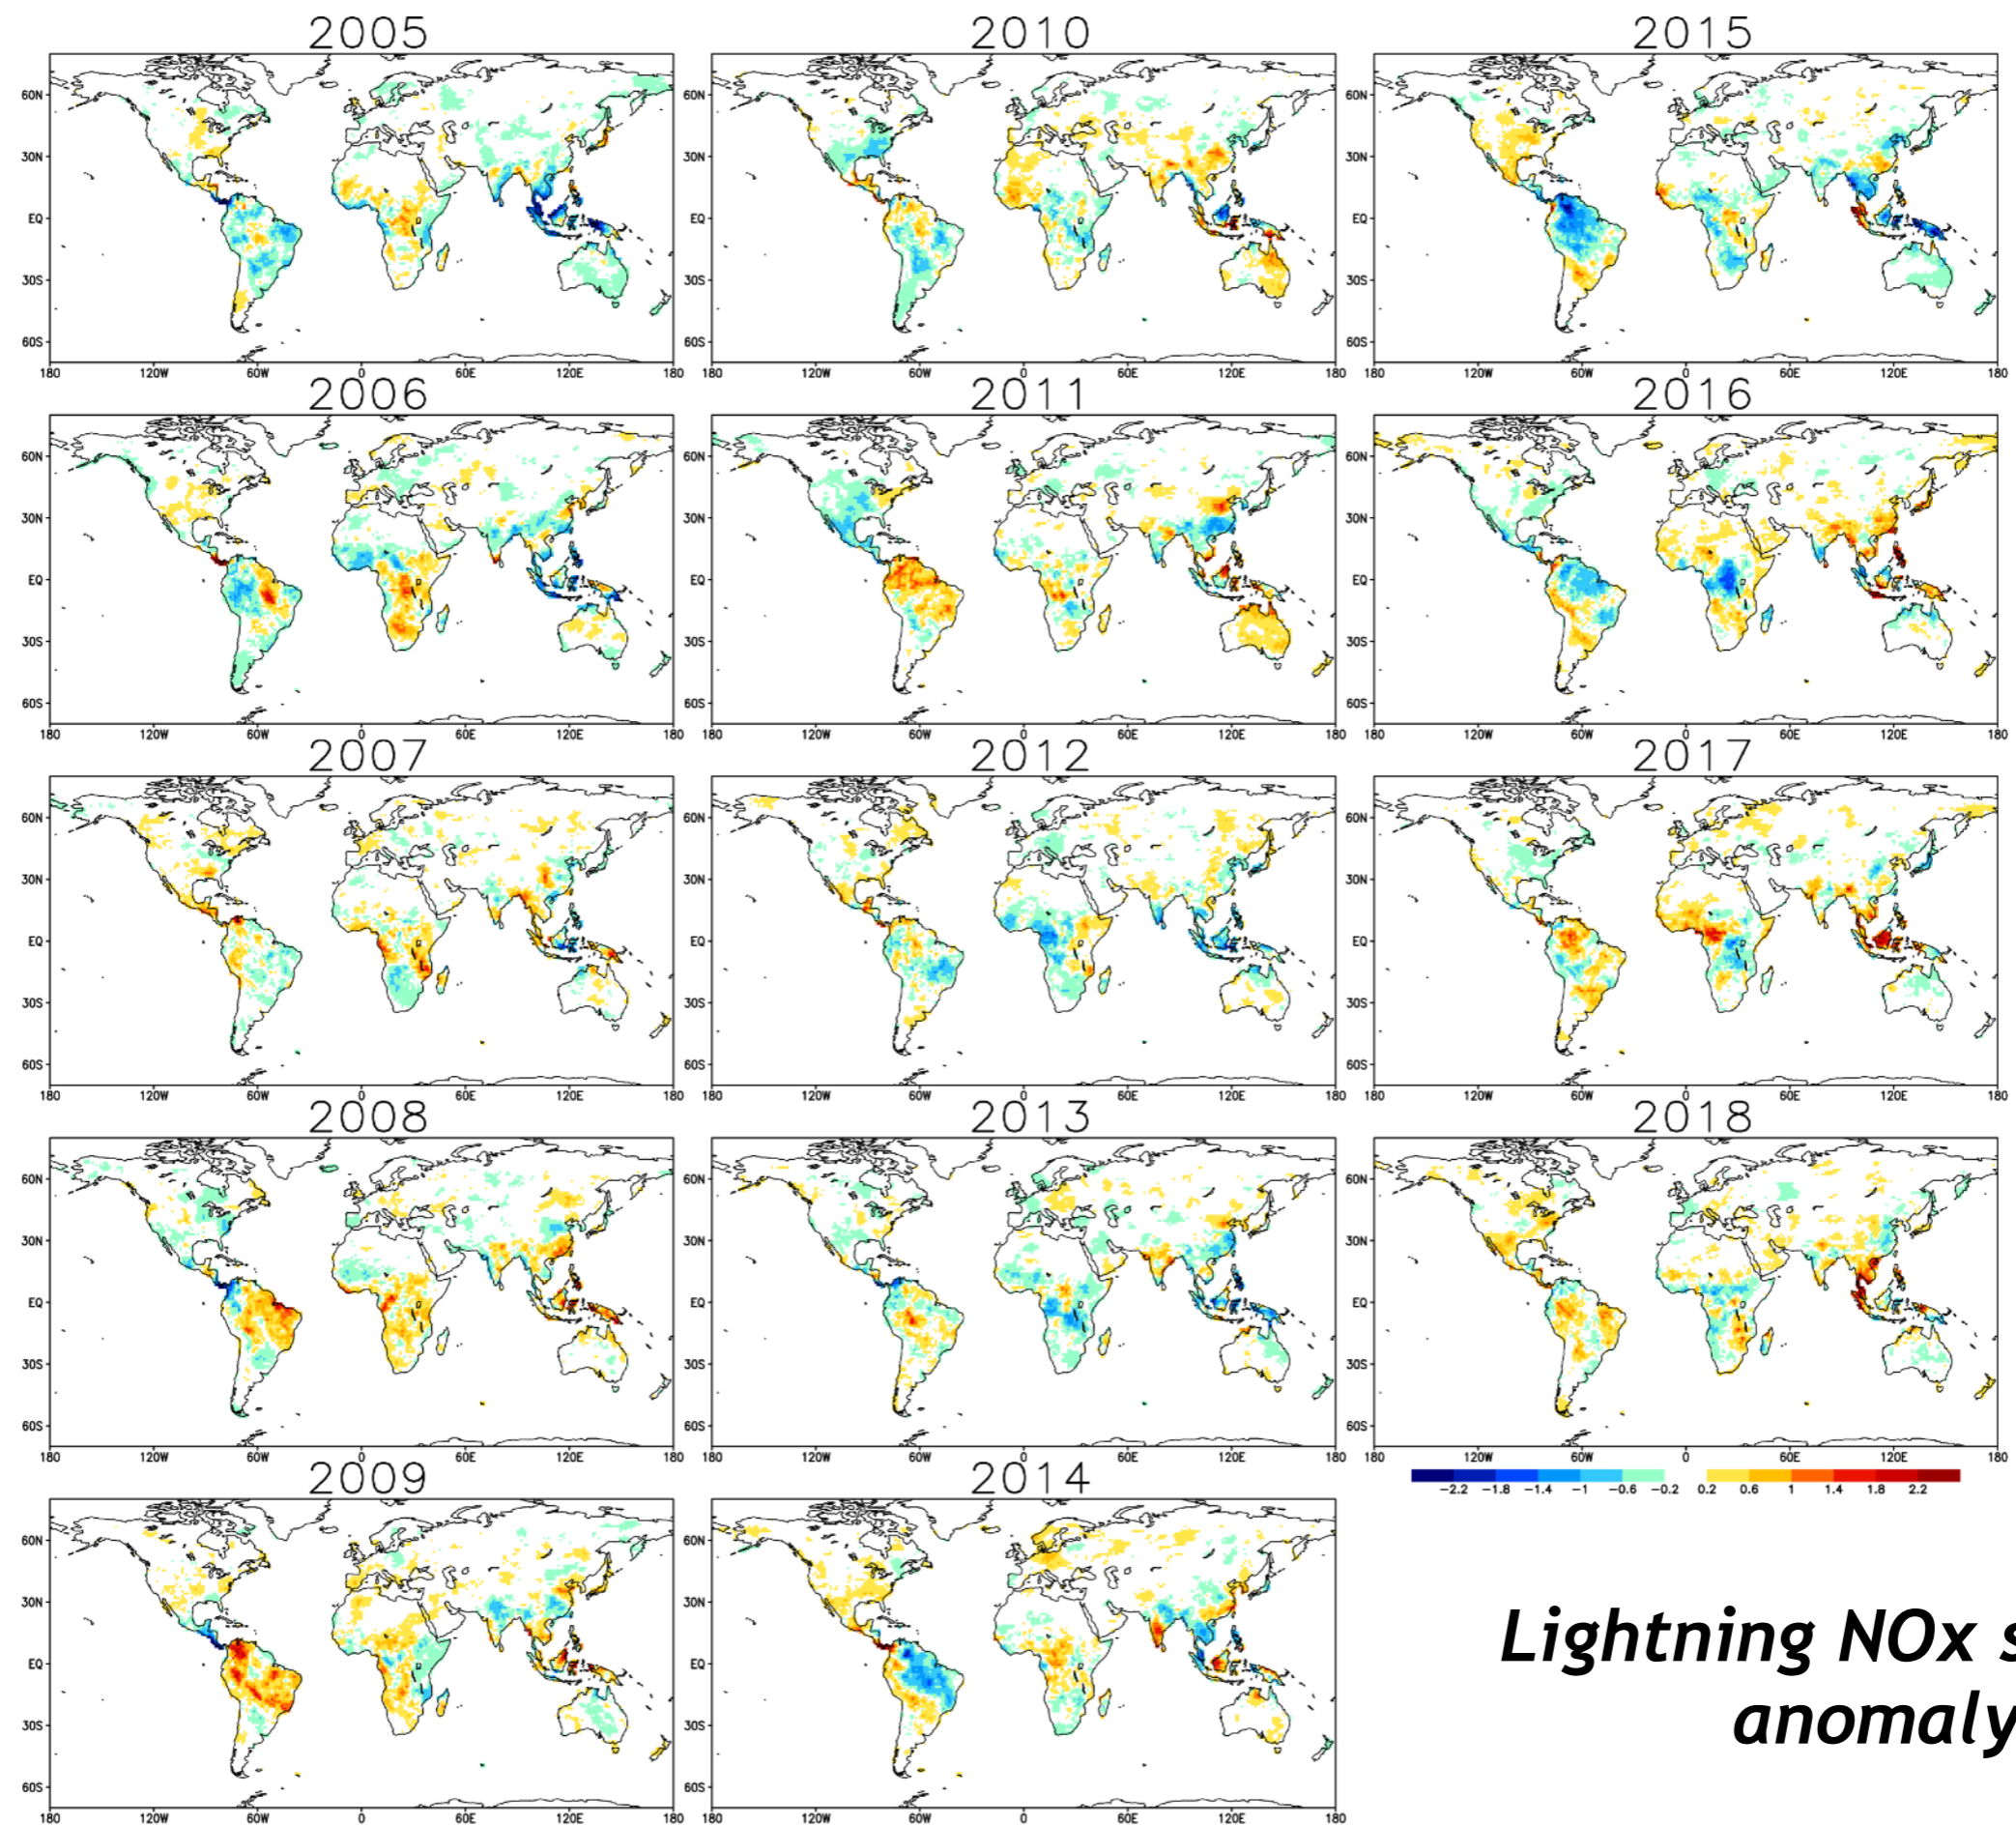

Fig. S10: Anomaly of annual mean surface ozone concentrations (in ppb) from the 14-year mean (2005-2018) in TCR-2.

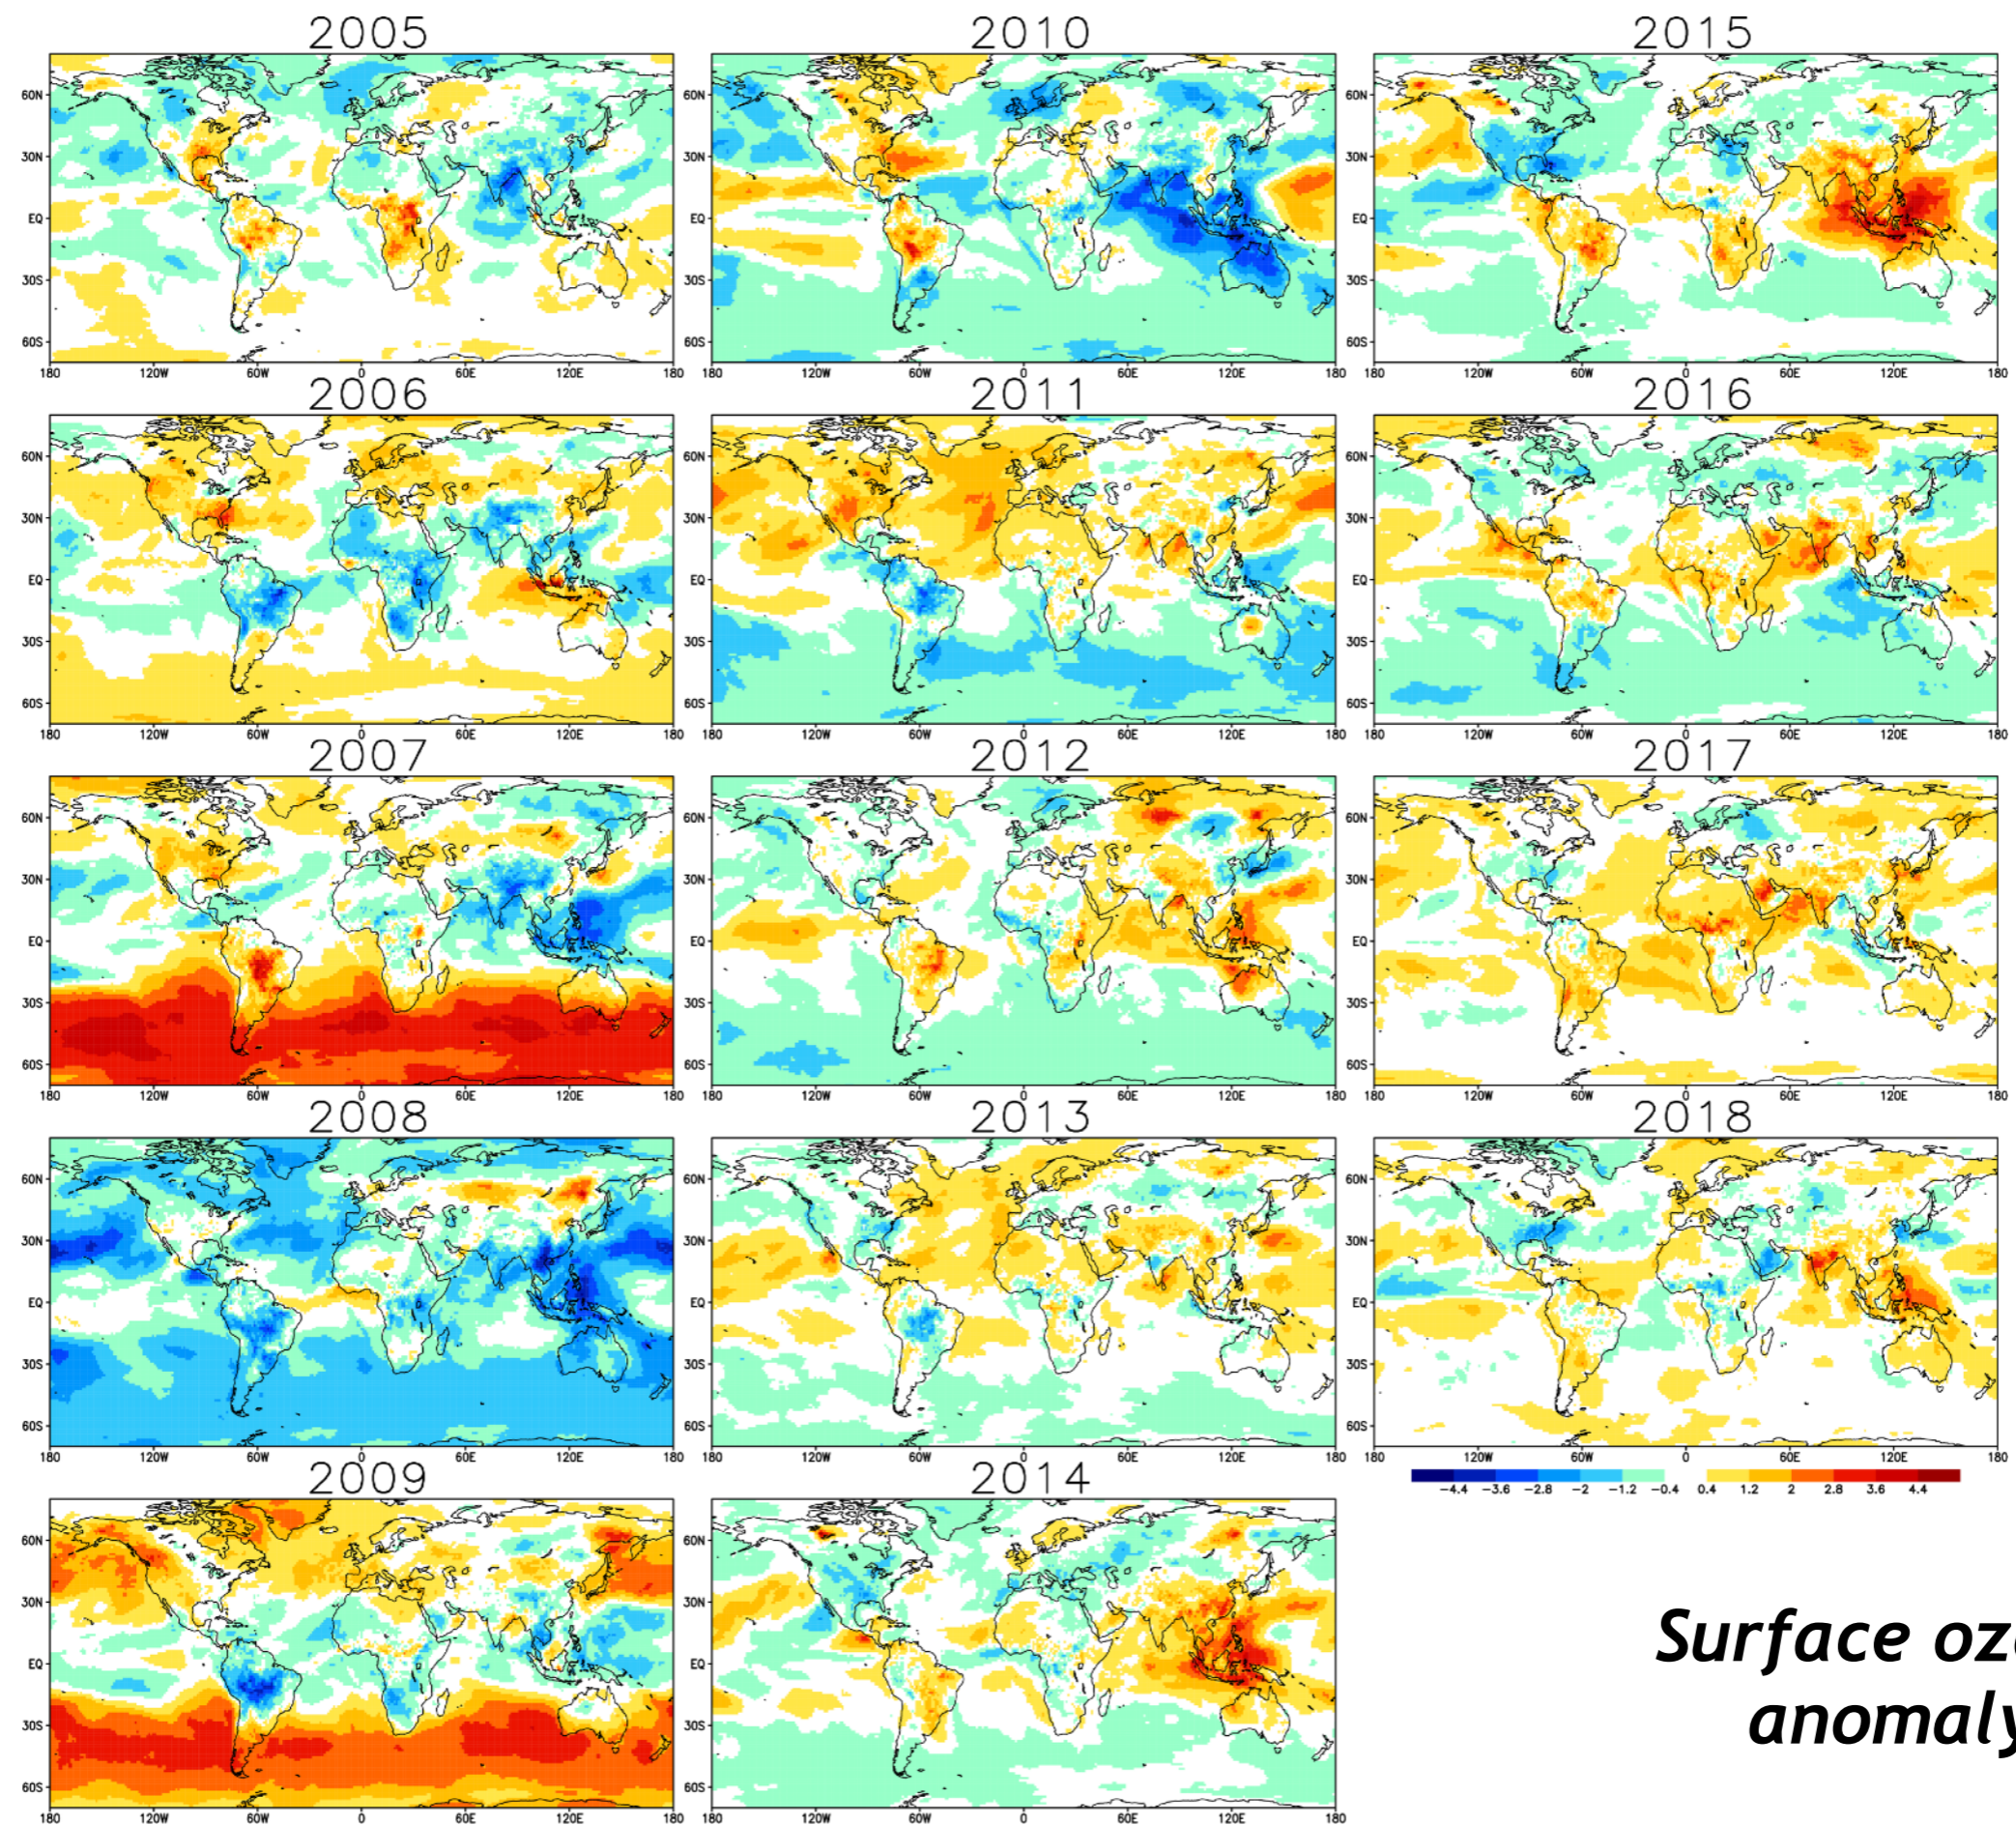

***Surface ozone  
anomaly***

Fig. S11: Same as in Fig S10, but for the noTES reanalysis.

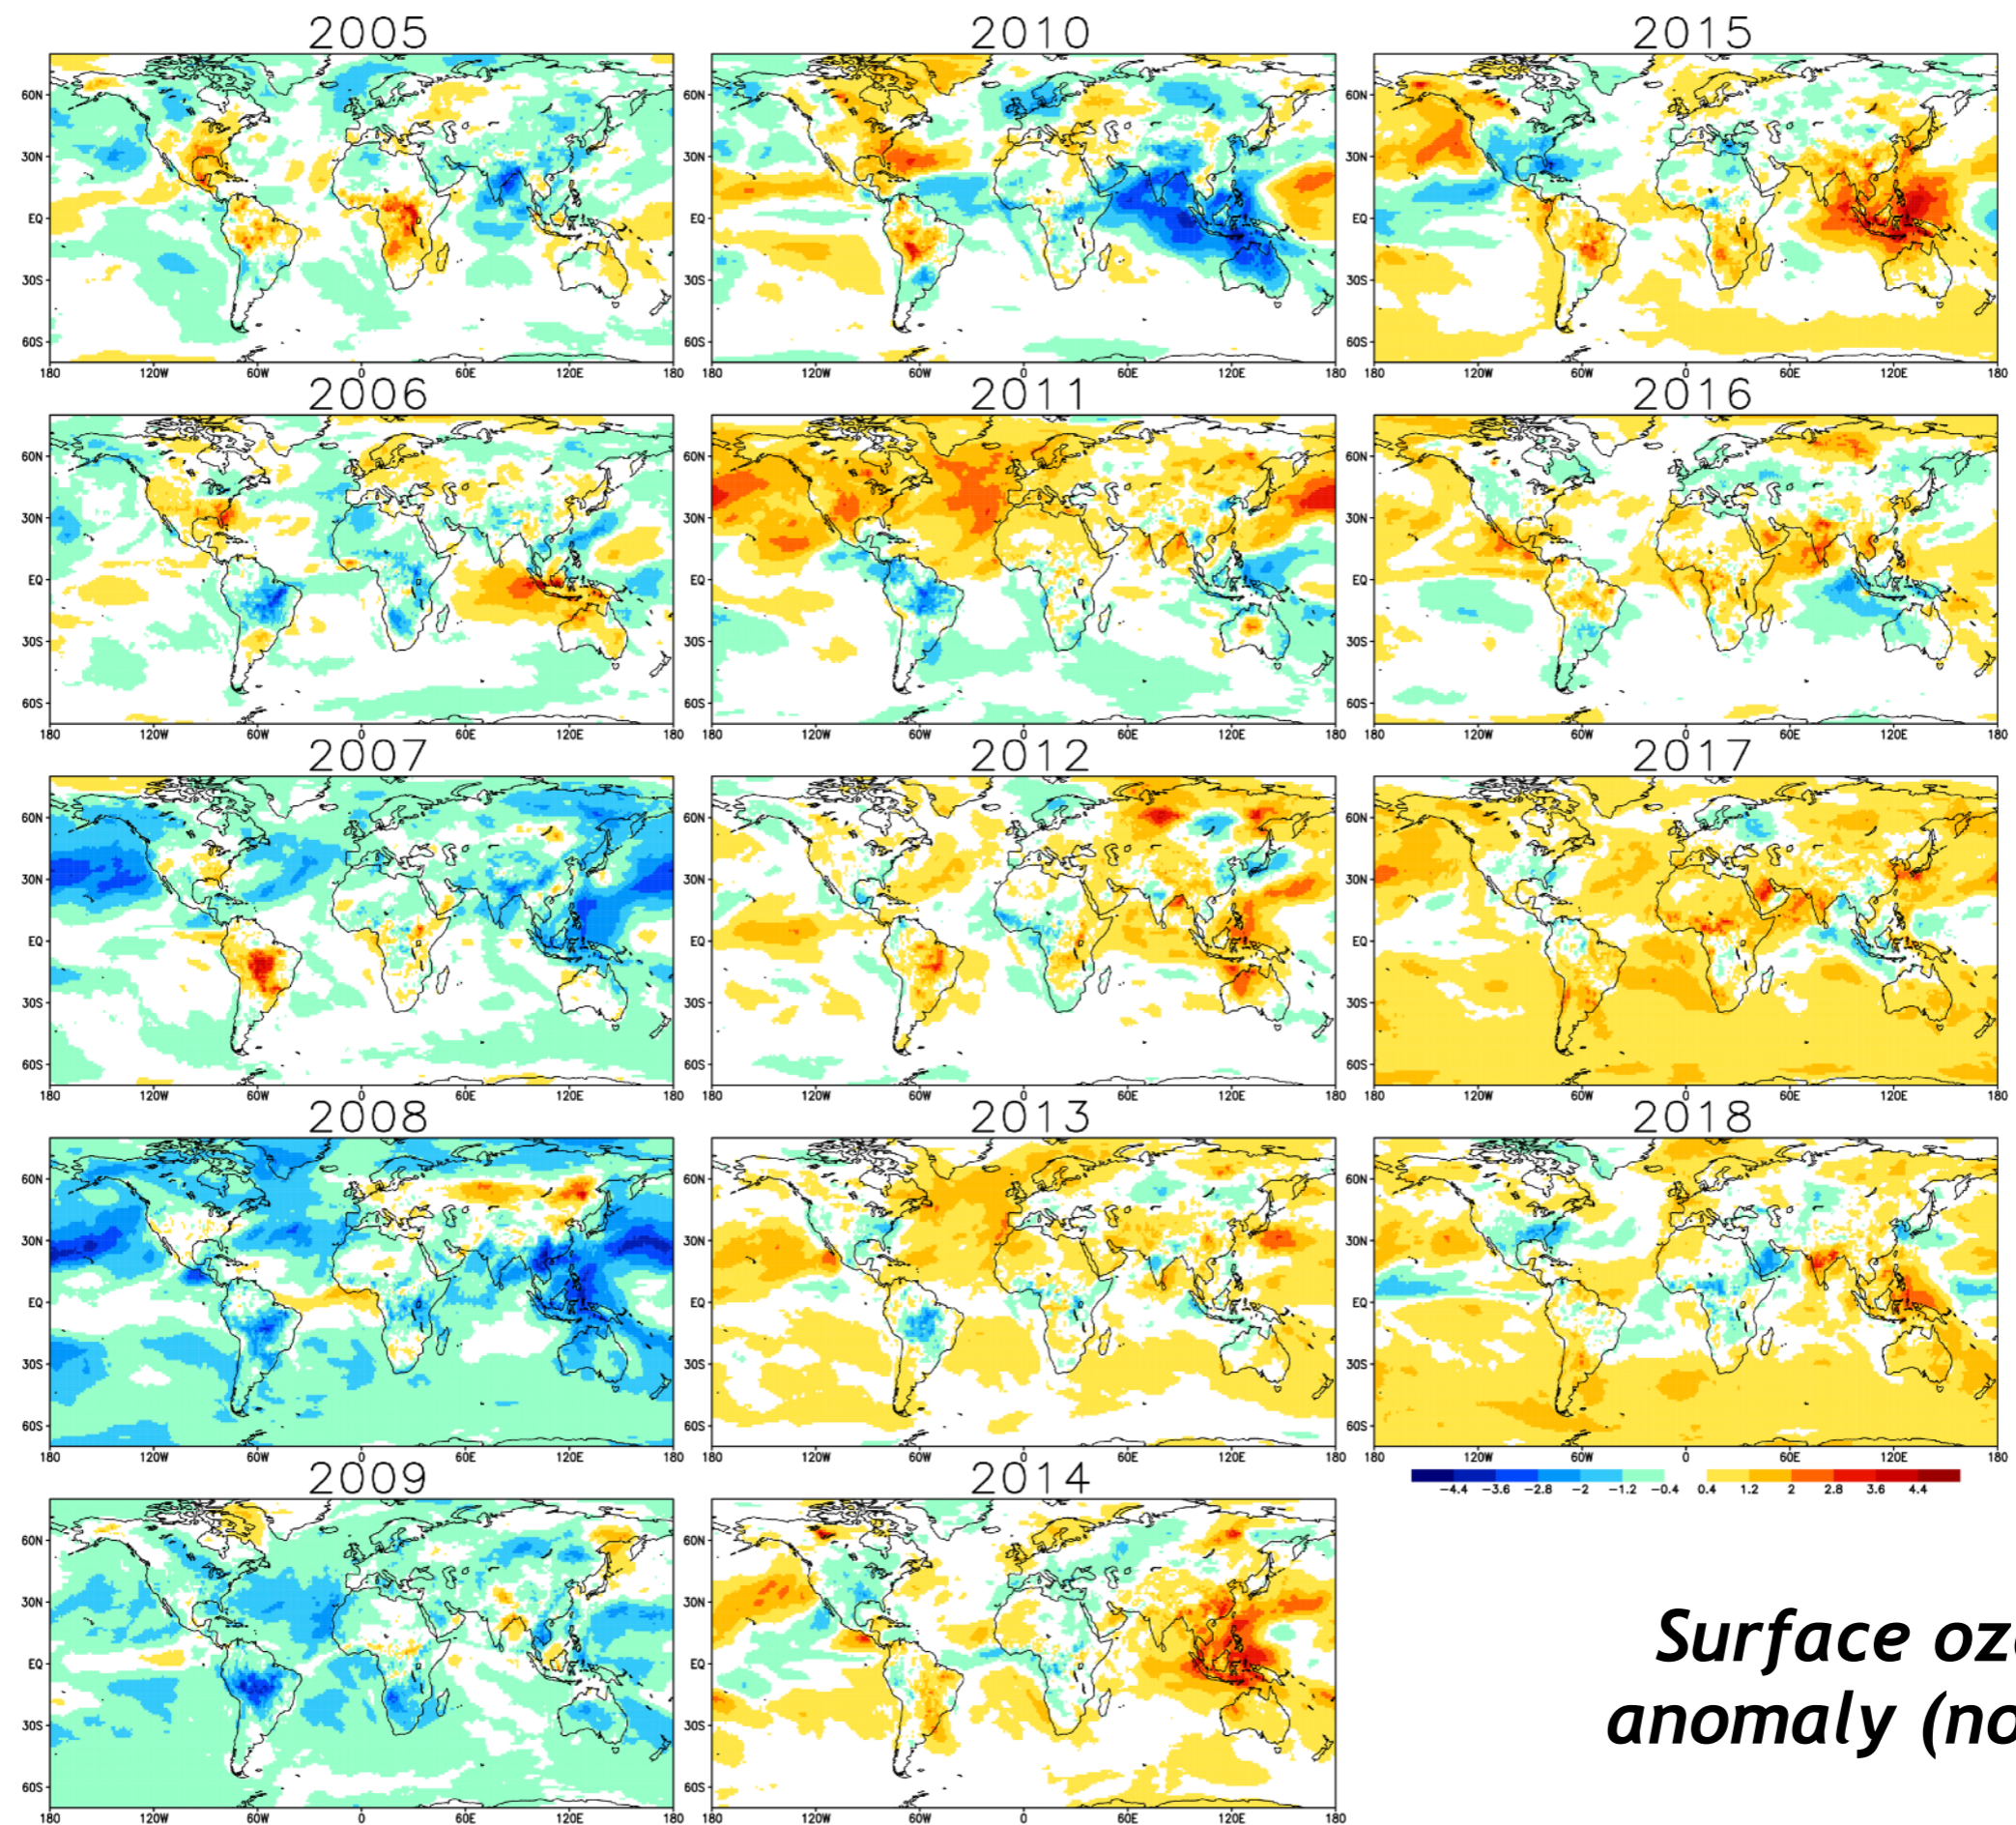

Fig. S12: Anomaly of annual mean 500 hPa ozone concentrations (in ppb) from the 14-year mean (2005-2018) in TCR-2.

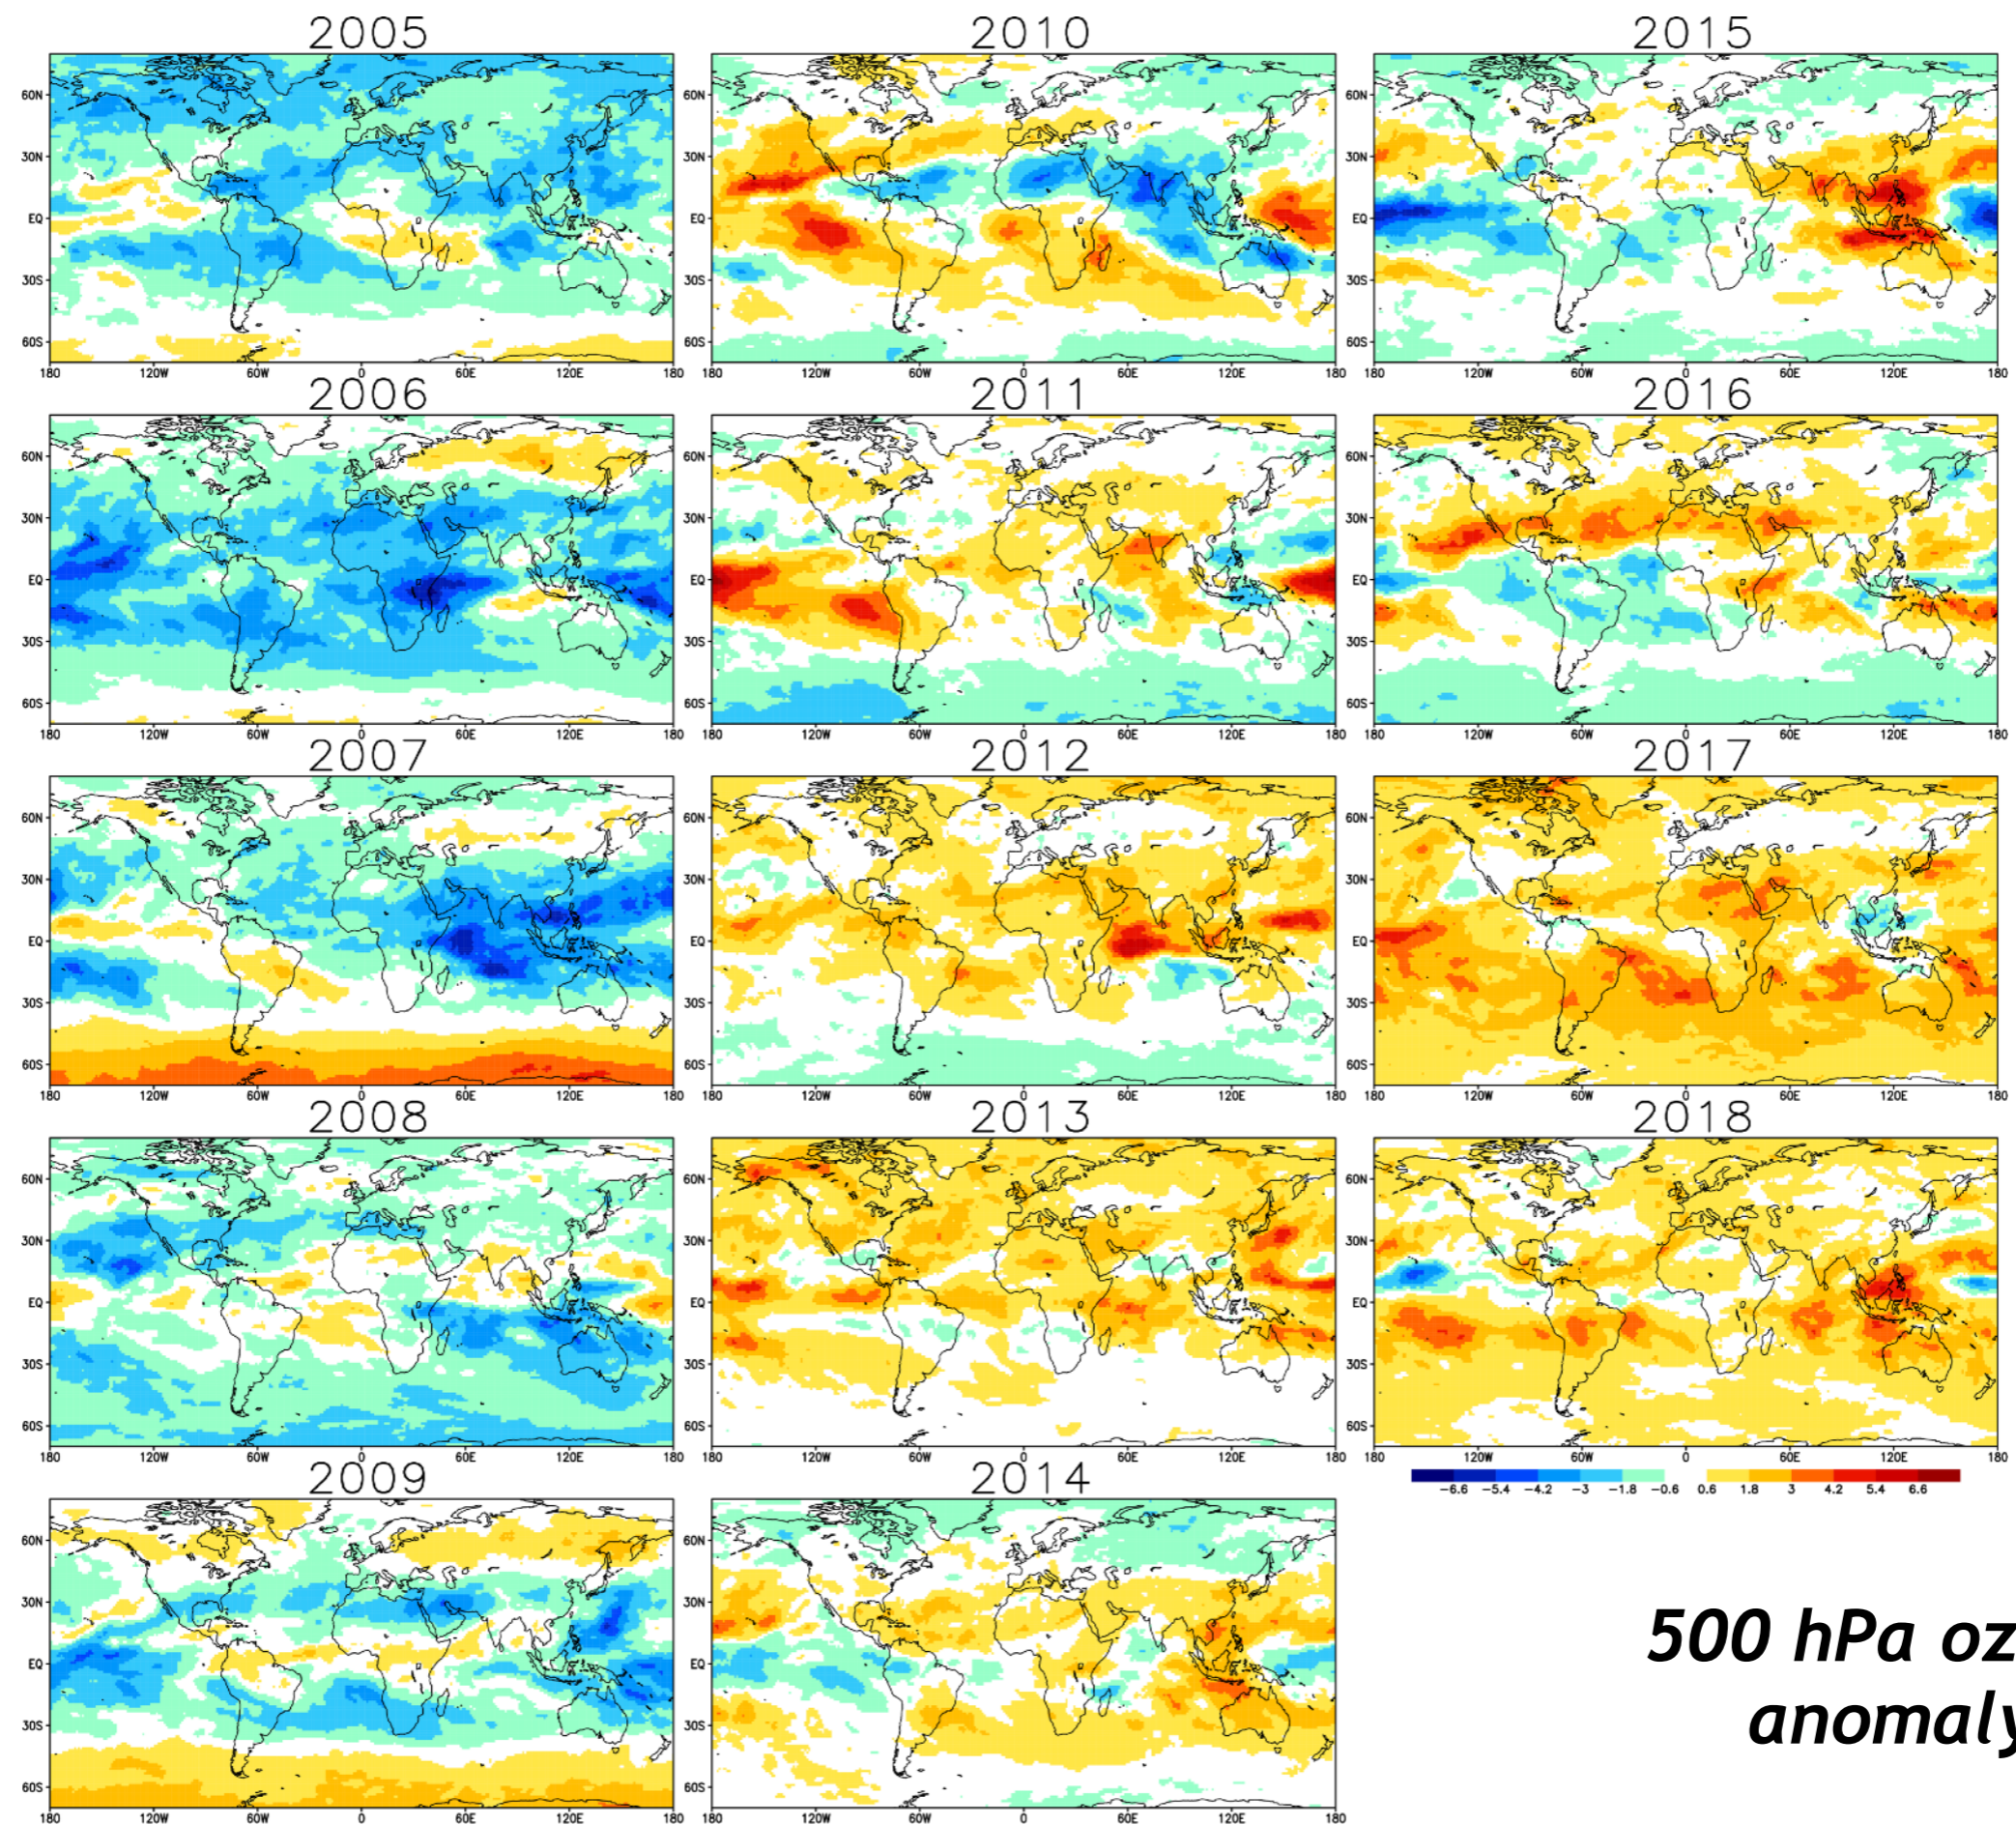

Fig. S13: Same as in Fig S12, but for the noTES reanalysis.

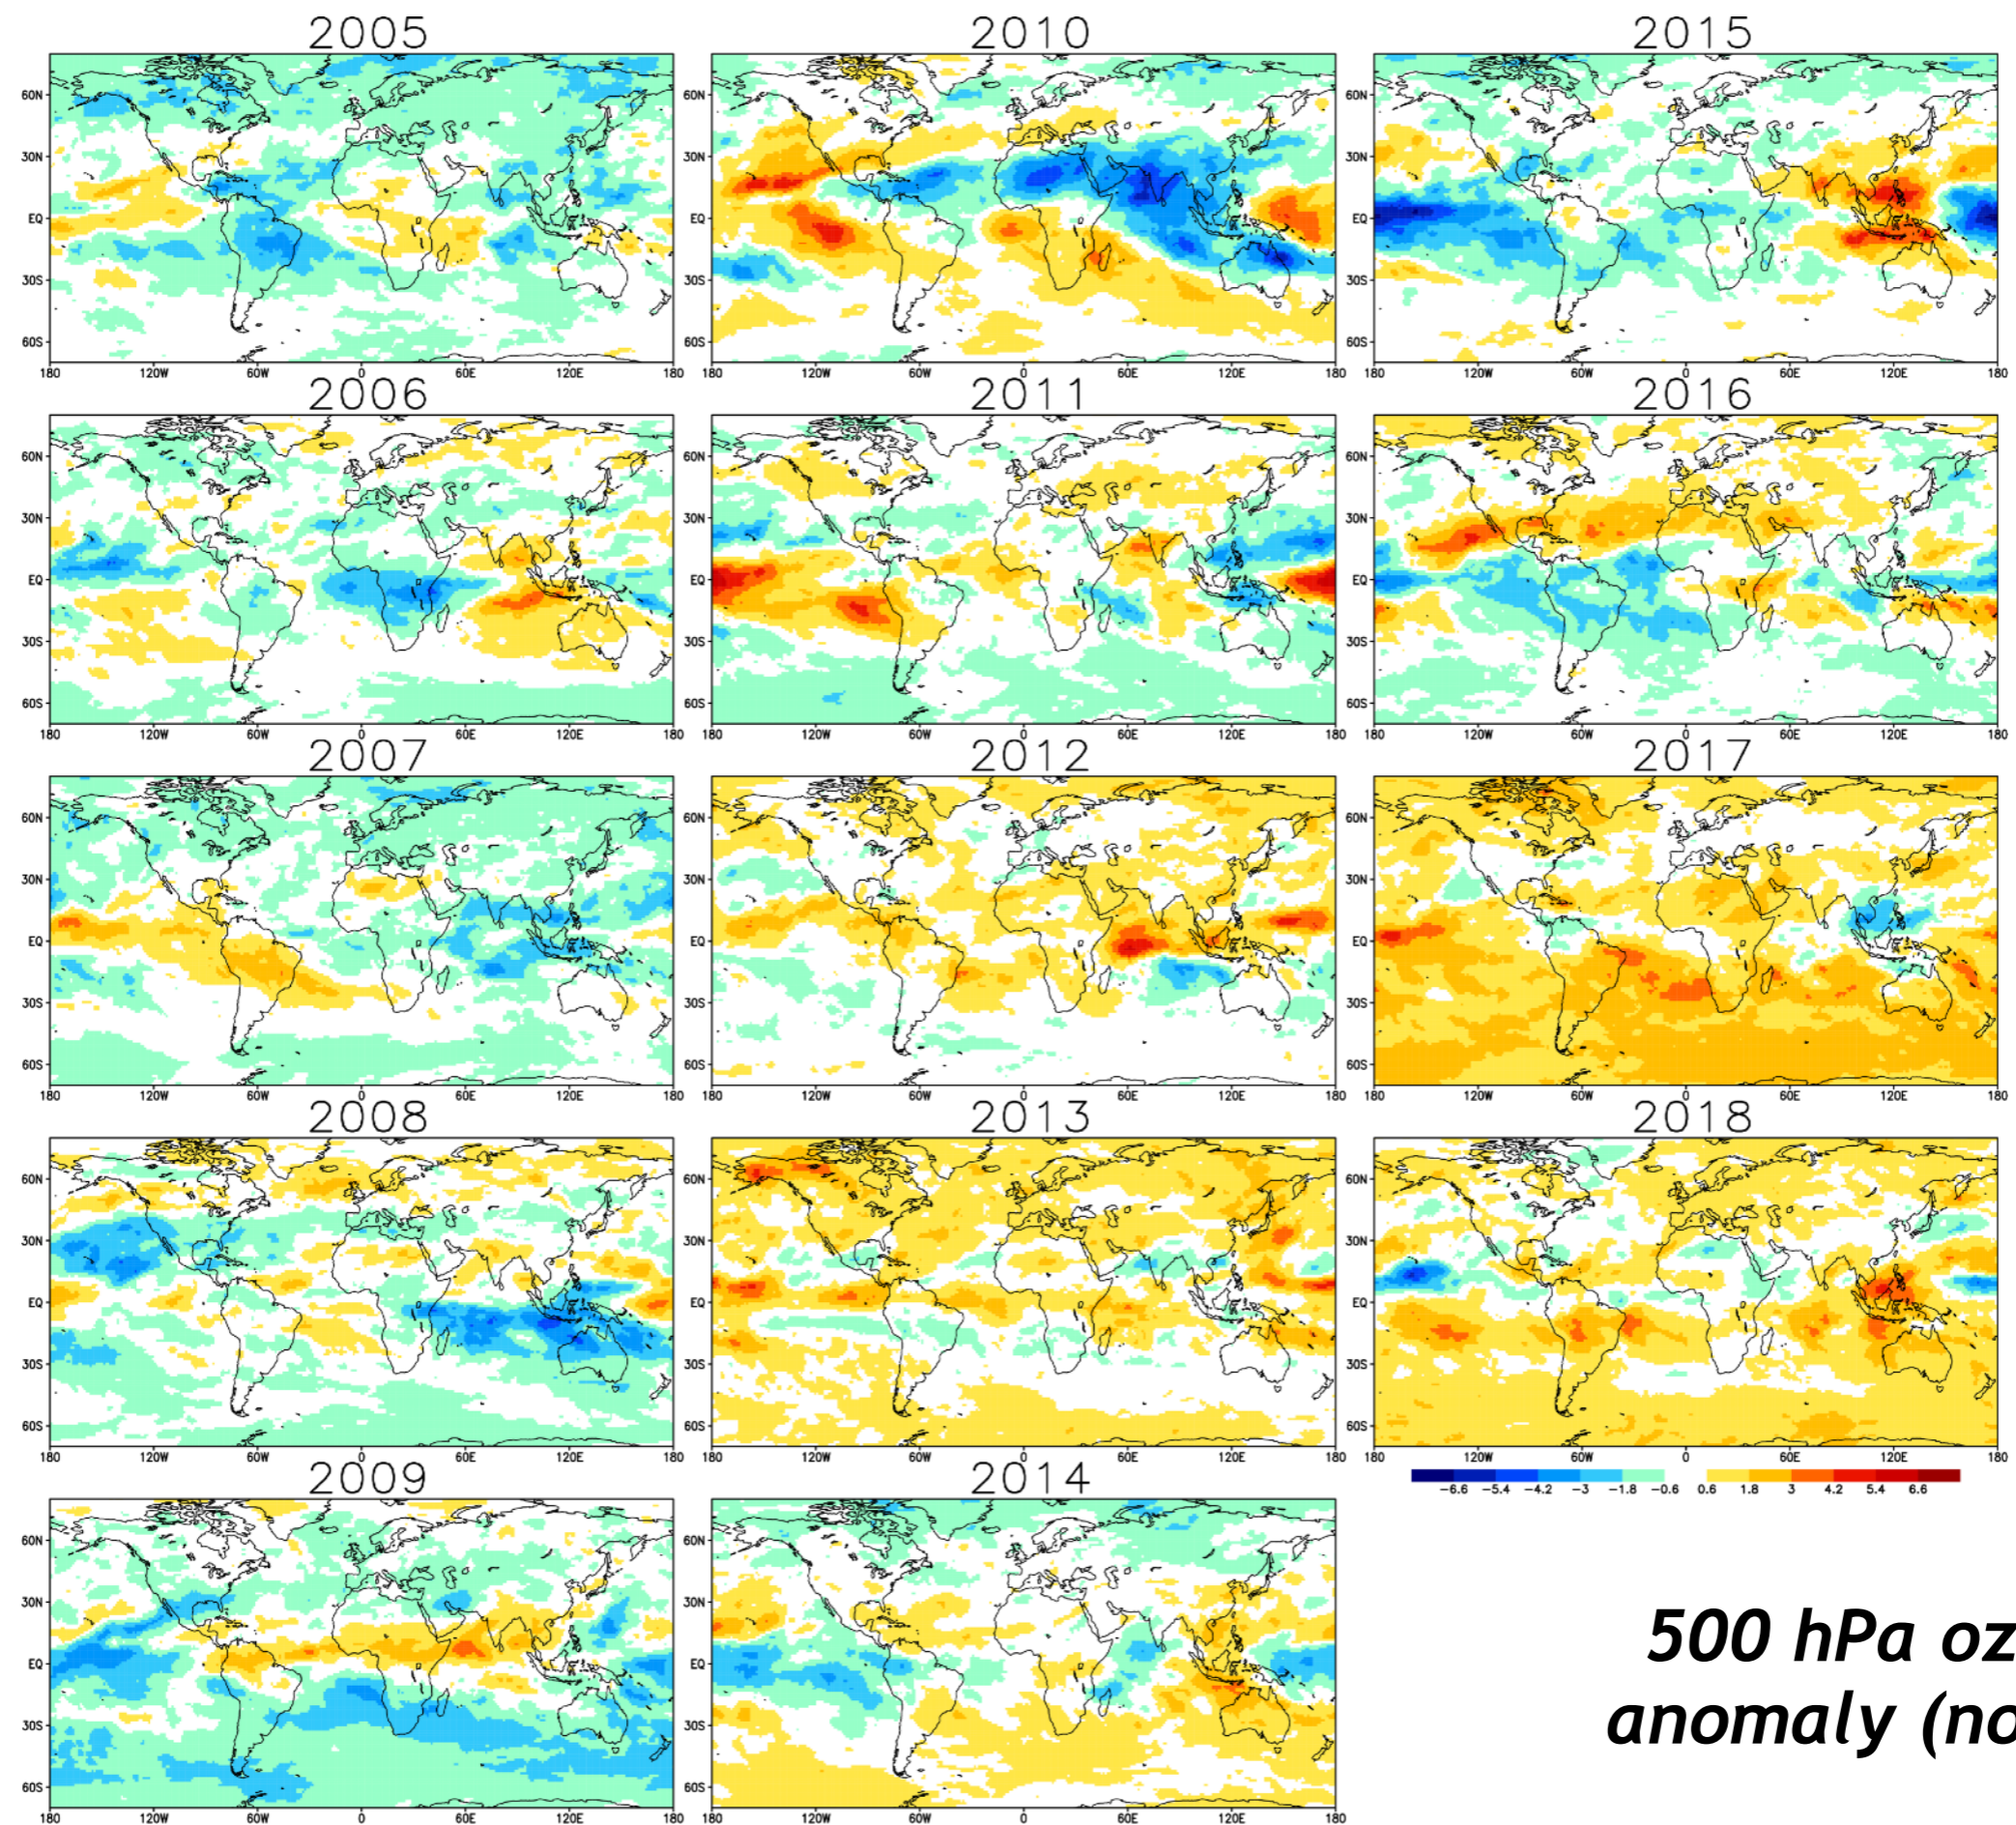

Fig. S14: Time-latitude cross section of zonal mean analysis spread of ozone (in ppb) at 600 hPa and 200 hPa.

Ozone analysis spread 600 hPa

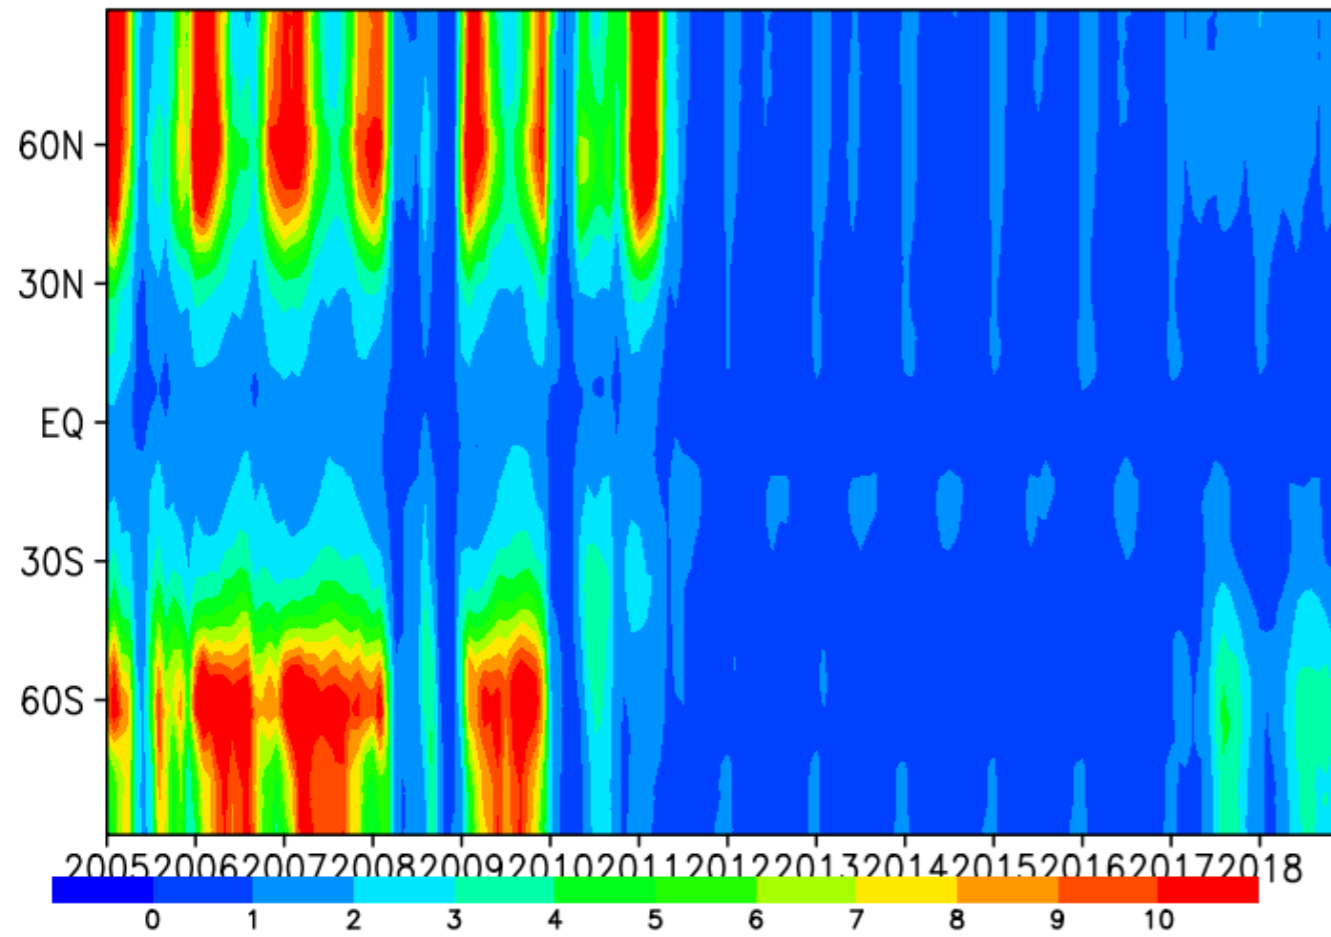

Ozone analysis spread 200 hPa

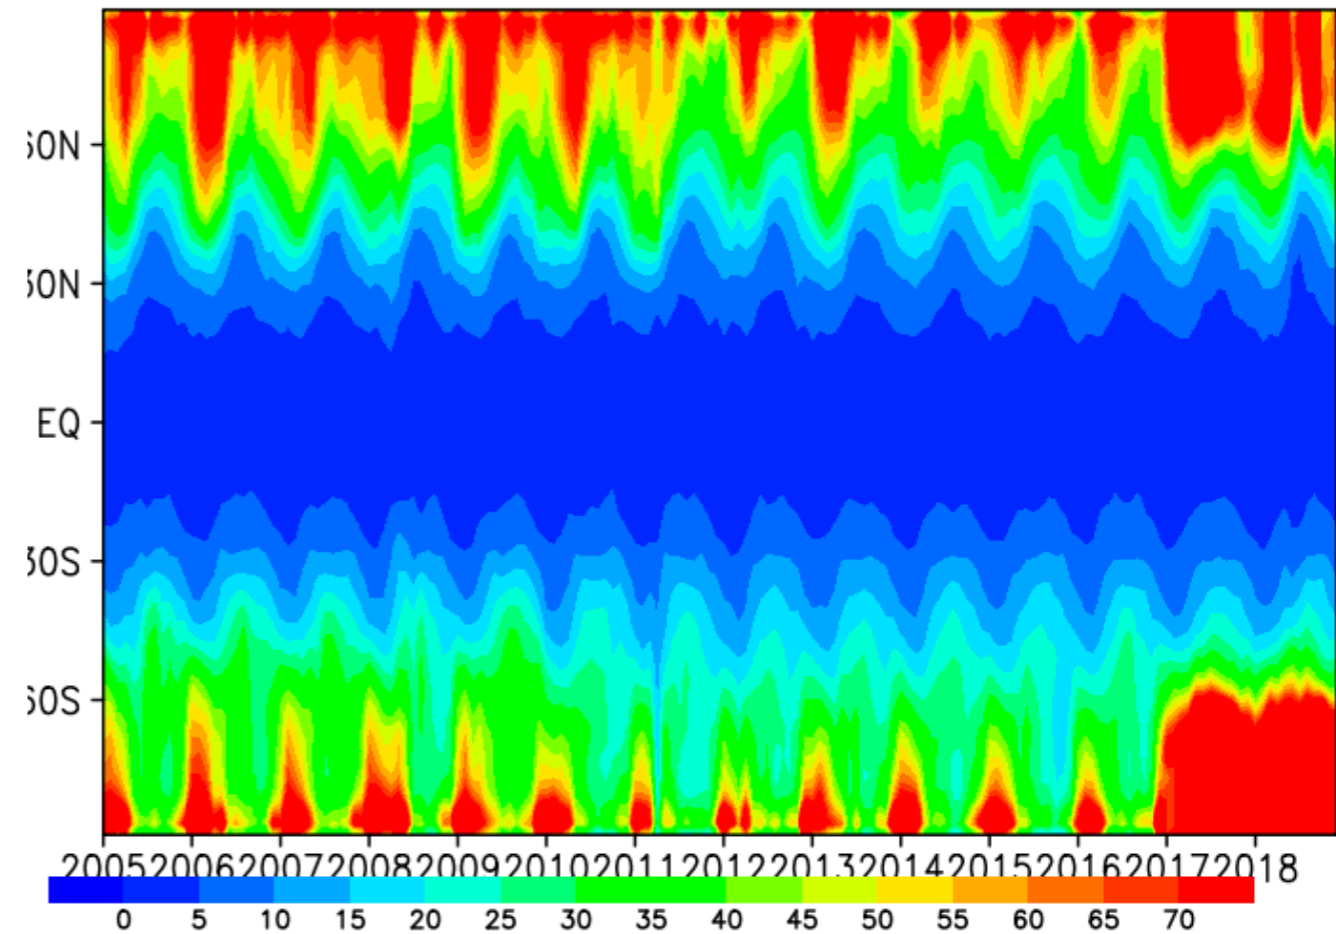

Table S1: Model minus observation comparisons of the mean ozone concentrations(in ppb) between the analysis or control run (in brackets) and the observations for HIPPO aircraft measurements during 2009–2011.

| Ozone<br>(ppb) |       | 90-55S |      | 55-15S |      | 15S-15N |      | 15N-55N |      | 55N-90N |      |
|----------------|-------|--------|------|--------|------|---------|------|---------|------|---------|------|
|                |       | Bias   | RMSE | Bias   | RMSE | Bias    | RMSE | Bias    | RMSE | Bias    | RMSE |
| 850-500<br>hPa | Assim | -0.9   | 6.1  | 2.0    | 6.6  | 2.4     | 7.4  | 1.6     | 8.7  | 2.0     | 7.7  |
|                | Free  | -4.5   | 6.2  | -4.1   | 7.2  | -3.6    | 7.5  | -4.6    | 9.5  | -4.0    | 7.3  |
| 500-200<br>hPa | Assim | 4.6    | 1.9  | 4.6    | 14.3 | 5.0     | 10.0 | 4.5     | 19.4 | 2.5     | 36.2 |
|                | Free  | 42.6   | 58.7 | 4.3    | 19.6 | -2.6    | 19.6 | 8.1     | 24.1 | 31.9    | 56.6 |

Table S2: Same as in Table S1, but for CO (in ppb).

| CO<br>(ppb)    |       | 90-55S |      | 55-15S |      | 15S-15N |      | 15N-55N |      | 55N-90N |      |
|----------------|-------|--------|------|--------|------|---------|------|---------|------|---------|------|
|                |       | Bias   | RMSE | Bias   | RMSE | Bias    | RMSE | Bias    | RMSE | Bias    | RMSE |
| 850-500<br>hPa | Assim | 6.5    | 6.6  | 6.2    | 7.5  | 3.3     | 9.5  | -9.7    | 16.5 | -15.1   | 17.4 |
|                | Free  | 17.8   | 17.8 | 18.6   | 18.9 | 15.7    | 18.7 | -5.9    | 16.4 | -15.5   | 16.9 |
|                | Assim | 8.7    | 8.9  | 7.9    | 9.4  | 7.1     | 10.1 | -2.4    | 16.5 | -4.0    | 6.5  |
|                | Free  | 19.9   | 20.0 | 21.6   | 22.1 | 21.7    | 22.4 | 5.0     | 20.0 | -1.2    | 21.4 |

Table S3: Yearly surface NOx emissions in TgNyr<sup>-1</sup>.

| TgNyr <sup>-1</sup> | Globe | NH    | Tropics | SH   | Europe | USA  | C Africa | E China | S Africa | S America | N Africa | SE Asia | Australia | India |
|---------------------|-------|-------|---------|------|--------|------|----------|---------|----------|-----------|----------|---------|-----------|-------|
| 2005                | 50.59 | 29.51 | 17.59   | 3.48 | 5.05   | 6.74 | 3.06     | 5.45    | 0.69     | 1.40      | 3.49     | 0.65    | 1.58      | 2.91  |
| 2006                | 50.60 | 30.24 | 16.74   | 3.62 | 5.21   | 6.46 | 2.89     | 5.64    | 0.68     | 1.15      | 3.00     | 0.57    | 1.85      | 3.01  |
| 2007                | 50.39 | 30.04 | 16.65   | 3.70 | 4.98   | 6.07 | 2.80     | 5.83    | 0.71     | 1.46      | 3.26     | 0.62    | 1.57      | 2.92  |
| 2008                | 48.50 | 30.04 | 15.17   | 3.29 | 4.78   | 5.65 | 2.75     | 5.83    | 0.67     | 0.99      | 3.12     | 0.49    | 1.36      | 2.96  |
| 2009                | 47.14 | 28.23 | 15.56   | 3.34 | 4.54   | 5.36 | 2.87     | 5.87    | 0.64     | 0.88      | 3.13     | 0.52    | 1.47      | 3.16  |
| 2010                | 49.83 | 30.23 | 16.29   | 3.31 | 4.57   | 5.08 | 2.87     | 6.77    | 0.67     | 1.56      | 2.91     | 0.61    | 1.25      | 3.11  |
| 2011                | 49.41 | 29.82 | 16.05   | 3.55 | 4.69   | 5.18 | 2.78     | 7.06    | 0.66     | 1.01      | 3.20     | 0.54    | 1.78      | 3.43  |
| 2012                | 49.87 | 28.92 | 17.16   | 3.78 | 4.63   | 5.05 | 2.88     | 6.86    | 0.68     | 1.15      | 3.13     | 0.59    | 1.78      | 3.45  |
| 2013                | 49.87 | 29.82 | 16.67   | 3.39 | 4.42   | 5.05 | 2.83     | 6.84    | 0.67     | 1.00      | 3.10     | 0.59    | 1.52      | 3.50  |
| 2014                | 50.30 | 29.19 | 17.50   | 3.61 | 4.40   | 4.98 | 2.77     | 6.43    | 0.72     | 1.08      | 3.22     | 0.65    | 1.62      | 3.54  |
| 2015                | 49.17 | 27.57 | 17.96   | 3.65 | 4.33   | 4.85 | 2.93     | 5.84    | 0.70     | 1.17      | 3.23     | 0.65    | 1.62      | 3.64  |
| 2016                | 47.93 | 27.39 | 17.19   | 3.35 | 4.47   | 4.84 | 2.84     | 5.63    | 0.68     | 1.05      | 3.30     | 0.67    | 1.45      | 3.66  |
| 2017                | 47.41 | 26.46 | 17.34   | 3.61 | 4.47   | 4.91 | 2.85     | 5.75    | 0.68     | 1.12      | 3.30     | 0.60    | 1.57      | 3.75  |
| 2018                | 48.27 | 27.87 | 16.91   | 3.48 | 4.41   | 4.66 | 2.83     | 5.76    | 0.68     | 1.13      | 3.03     | 0.61    | 1.58      | 3.78  |

Table S4: Yearly surface CO emissions in TgCOyr<sup>-1</sup>.

| TgCOyr <sup>-1</sup> | Globe   | NH     | Tropics | SH    | Europe | USA   | C Africa | E China | S Africa | S America | N Africa | SE Asia | Australia | India |
|----------------------|---------|--------|---------|-------|--------|-------|----------|---------|----------|-----------|----------|---------|-----------|-------|
| 2005                 | 1159.57 | 616.55 | 503.78  | 39.26 | 47.91  | 67.80 | 156.43   | 195.03  | 7.53     | 79.30     | 107.30   | 14.75   | 11.79     | 73.85 |
| 2006                 | 1111.34 | 612.92 | 460.56  | 37.88 | 48.94  | 71.27 | 159.31   | 183.60  | 7.10     | 35.76     | 92.31    | 11.28   | 16.99     | 68.19 |
| 2007                 | 1108.76 | 589.86 | 477.70  | 41.22 | 38.30  | 71.19 | 142.79   | 177.46  | 7.68     | 68.18     | 104.14   | 16.68   | 14.27     | 76.75 |
| 2008                 | 1058.13 | 591.94 | 429.61  | 36.59 | 40.65  | 69.87 | 164.48   | 174.37  | 8.29     | 30.49     | 112.71   | 10.29   | 9.77      | 74.54 |
| 2009                 | 1022.17 | 549.56 | 433.24  | 39.38 | 38.55  | 63.43 | 172.43   | 176.35  | 6.70     | 10.06     | 95.46    | 10.91   | 15.52     | 70.61 |
| 2010                 | 1152.88 | 577.29 | 530.65  | 44.96 | 41.97  | 56.93 | 186.01   | 179.26  | 8.40     | 86.27     | 102.68   | 17.59   | 8.66      | 79.78 |
| 2011                 | 1088.59 | 583.90 | 457.03  | 47.68 | 41.65  | 73.54 | 174.98   | 176.92  | 8.64     | 23.87     | 110.75   | 10.53   | 25.58     | 73.81 |
| 2012                 | 1130.63 | 638.17 | 448.83  | 43.64 | 49.94  | 67.46 | 150.93   | 179.53  | 7.94     | 32.26     | 106.95   | 13.31   | 26.85     | 80.96 |
| 2013                 | 1065.01 | 591.91 | 430.82  | 42.29 | 43.38  | 57.67 | 168.20   | 183.18  | 8.71     | 12.67     | 105.12   | 14.83   | 12.34     | 76.58 |
| 2014                 | 1102.37 | 597.61 | 467.14  | 37.63 | 34.96  | 69.74 | 164.90   | 168.54  | 9.03     | 19.09     | 102.23   | 11.70   | 14.94     | 73.35 |
| 2015                 | 1137.98 | 577.93 | 524.99  | 35.08 | 41.53  | 66.87 | 160.97   | 157.55  | 7.22     | 32.48     | 108.25   | 13.93   | 16.73     | 75.38 |
| 2016                 | 1122.68 | 591.68 | 494.34  | 36.67 | 44.12  | 60.55 | 166.87   | 173.70  | 6.65     | 33.90     | 127.14   | 18.31   | 11.17     | 88.99 |
| 2017                 | 1130.49 | 597.30 | 495.79  | 37.41 | 44.85  | 52.35 | 175.64   | 177.02  | 8.80     | 42.29     | 114.21   | 12.69   | 14.16     | 93.13 |
| 2018                 | 1062.53 | 564.73 | 457.88  | 39.94 | 37.45  | 55.31 | 164.94   | 174.46  | 7.34     | 32.13     | 110.05   | 14.44   | 16.90     | 86.58 |

Table S5: Yearly surface SO2 emissions in TgNyr<sup>-1</sup>.

| TgS yr <sup>-1</sup> | Globe | NH    | Tropics | SH   | Europe | USA  | C Africa | E China | S Africa | S America | N Africa | SE Asia | Australia | India |
|----------------------|-------|-------|---------|------|--------|------|----------|---------|----------|-----------|----------|---------|-----------|-------|
| 2005                 | 36.33 | 25.91 | 7.24    | 3.18 | 2.87   | 2.86 | 0.69     | 7.00    | 0.50     | 0.42      | 0.66     | 0.13    | 1.01      | 1.51  |
| 2006                 | 35.54 | 25.17 | 7.11    | 3.26 | 2.94   | 2.52 | 0.59     | 7.54    | 0.49     | 0.37      | 0.58     | 0.13    | 1.13      | 1.63  |
| 2007                 | 39.04 | 27.65 | 7.99    | 3.40 | 2.87   | 2.73 | 0.75     | 8.25    | 0.48     | 0.46      | 1.13     | 0.13    | 1.17      | 1.54  |
| 2008                 | 37.12 | 27.00 | 6.89    | 3.24 | 2.90   | 2.88 | 0.60     | 7.70    | 0.39     | 0.30      | 0.45     | 0.13    | 1.13      | 1.84  |
| 2009                 | 35.50 | 24.87 | 7.09    | 3.54 | 2.95   | 2.64 | 0.66     | 6.09    | 0.50     | 0.28      | 0.47     | 0.15    | 1.35      | 1.66  |
| 2010                 | 34.65 | 23.76 | 7.48    | 3.40 | 3.03   | 2.38 | 0.71     | 5.85    | 0.56     | 0.47      | 0.53     | 0.13    | 1.21      | 1.74  |
| 2011                 | 39.13 | 27.74 | 7.89    | 3.51 | 3.21   | 2.48 | 0.69     | 6.89    | 0.43     | 0.29      | 0.69     | 0.13    | 1.54      | 2.19  |
| 2012                 | 35.43 | 24.32 | 7.72    | 3.40 | 2.79   | 2.33 | 0.74     | 6.45    | 0.52     | 0.34      | 0.77     | 0.12    | 1.28      | 1.74  |
| 2013                 | 34.28 | 23.62 | 7.20    | 3.46 | 2.89   | 2.42 | 0.70     | 5.74    | 0.50     | 0.29      | 0.61     | 0.11    | 1.27      | 1.79  |
| 2014                 | 33.76 | 22.70 | 7.65    | 3.41 | 2.67   | 2.54 | 0.74     | 4.61    | 0.50     | 0.34      | 0.61     | 0.12    | 1.28      | 1.86  |
| 2015                 | 33.25 | 21.88 | 7.76    | 3.61 | 2.70   | 2.42 | 0.74     | 4.11    | 0.57     | 0.40      | 0.60     | 0.13    | 1.31      | 1.88  |
| 2016                 | 32.09 | 21.26 | 7.30    | 3.53 | 2.67   | 2.39 | 0.60     | 3.79    | 0.58     | 0.40      | 0.57     | 0.14    | 1.24      | 2.01  |
| 2017                 | 33.05 | 21.80 | 7.66    | 3.59 | 2.70   | 2.51 | 0.56     | 3.62    | 0.60     | 0.52      | 0.48     | 0.15    | 1.31      | 2.25  |
| 2018                 | 31.58 | 20.65 | 7.49    | 3.44 | 2.68   | 2.46 | 0.58     | 3.46    | 0.58     | 0.49      | 0.56     | 0.12    | 1.18      | 1.93  |

Table S6: Yearly lightning NOx sources in TgNyr<sup>-1</sup>.

| TgN yr <sup>-1</sup> | Globe | NH   | Tropics | SH   | N America | S America | S Africa | N Africa | Siberia | India | SE Asia | Pacific | Atlantic | Australia |
|----------------------|-------|------|---------|------|-----------|-----------|----------|----------|---------|-------|---------|---------|----------|-----------|
| 2005                 | 6.80  | 2.32 | 3.69    | 0.79 | 0.48      | 0.98      | 0.80     | 0.74     | 0.51    | 0.06  | 0.77    | 0.19    | 0.02     | 0.21      |
| 2006                 | 7.08  | 2.37 | 3.87    | 0.84 | 0.50      | 1.07      | 0.90     | 0.66     | 0.55    | 0.05  | 0.86    | 0.17    | 0.01     | 0.26      |
| 2007                 | 7.61  | 2.55 | 4.19    | 0.87 | 0.52      | 1.11      | 0.83     | 0.73     | 0.58    | 0.06  | 0.98    | 0.21    | 0.03     | 0.26      |
| 2008                 | 7.72  | 2.44 | 4.39    | 0.89 | 0.43      | 1.25      | 0.90     | 0.73     | 0.53    | 0.06  | 1.06    | 0.22    | 0.02     | 0.28      |
| 2009                 | 7.88  | 2.54 | 4.38    | 0.96 | 0.50      | 1.34      | 0.82     | 0.75     | 0.58    | 0.06  | 1.04    | 0.23    | 0.02     | 0.25      |
| 2010                 | 7.45  | 2.49 | 4.07    | 0.89 | 0.40      | 1.04      | 0.75     | 0.72     | 0.57    | 0.06  | 0.98    | 0.24    | 0.03     | 0.32      |
| 2011                 | 7.70  | 2.35 | 4.36    | 0.99 | 0.39      | 1.28      | 0.81     | 0.70     | 0.58    | 0.07  | 0.98    | 0.26    | 0.02     | 0.36      |
| 2012                 | 7.38  | 2.53 | 3.89    | 0.96 | 0.50      | 1.07      | 0.74     | 0.66     | 0.56    | 0.07  | 0.88    | 0.28    | 0.02     | 0.27      |
| 2013                 | 7.33  | 2.43 | 3.97    | 0.93 | 0.46      | 1.14      | 0.69     | 0.67     | 0.57    | 0.07  | 0.87    | 0.28    | 0.03     | 0.26      |
| 2014                 | 7.63  | 2.58 | 4.09    | 0.97 | 0.54      | 0.99      | 0.81     | 0.74     | 0.57    | 0.07  | 0.93    | 0.27    | 0.03     | 0.28      |
| 2015                 | 7.13  | 2.44 | 3.75    | 0.94 | 0.55      | 0.94      | 0.77     | 0.69     | 0.53    | 0.07  | 0.88    | 0.28    | 0.03     | 0.22      |
| 2016                 | 7.67  | 2.62 | 4.05    | 1.01 | 0.44      | 1.05      | 0.75     | 0.76     | 0.58    | 0.07  | 1.06    | 0.27    | 0.02     | 0.24      |
| 2017                 | 7.76  | 2.47 | 4.33    | 0.97 | 0.45      | 1.20      | 0.76     | 0.82     | 0.54    | 0.05  | 1.08    | 0.23    | 0.03     | 0.25      |
| 2018                 | 7.86  | 2.59 | 4.31    | 0.96 | 0.55      | 1.20      | 0.79     | 0.71     | 0.58    | 0.06  | 1.08    | 0.26    | 0.02     | 0.26      |
